# Supplementary material for: Evidence for Introgression Among Three Species of the Anastrepha fraterculus Group, a Radiating Species Complex of Fruit Flies
Source: Front Genet. 2018 Sep 10;9:359. doi: 10.3389/fgene.2018.00359 (PMC6139333; doi:10.3389/fgene.2018.00359)
Supplement: Supplementary file 2 [file Data_Sheet_4.XLS]

## Sheet: 2016_11_01_seqids
Table S4. GenBank accession numbers for all sequences generated in Anastrepha species
Lab Code (gene)	GenBank Accession Number	Sample	Genebank Header
Amy-p	KY923830	F_0_02	Anastrepha fraterculus isolate F2 alpha-amylase (amy) gene, partial cds	Amylase	KY923830	F2	Anastrepha fraterculus isolate F2 alpha-amylase (amy) gene, partial cds	Amylase	KY923830	F2	Anastrepha fraterculus isolate F2 alpha-amylase (amy) gene, partial cds	Amylase	KY923830	F2	Anastrepha fraterculus isolate F2 alpha-amylase (amy) gene, partial cds	Amylase	KY923830	F2	Anastrepha fraterculus isolate F2 alpha-amylase (amy) gene, partial cds	Amylase	KY923830	F2	Anastrepha fraterculus isolate F2 alpha-amylase (amy) gene, partial cds	Amylase	KY923830	F2	Anastrepha fraterculus isolate F2 alpha-amylase (amy) gene, partial cds	Amylase	KY923830	F2	Anastrepha fraterculus isolate F2 alpha-amylase (amy) gene, partial cds	Amylase	KY923830	F2	Anastrepha fraterculus isolate F2 alpha-amylase (amy) gene, partial cds	Amylase	KY923830	F2	Anastrepha fraterculus isolate F2 alpha-amylase (amy) gene, partial cds	Amylase	KY923830	F2	Anastrepha fraterculus isolate F2 alpha-amylase (amy) gene, partial cds	Amylase	KY923830	F2	Anastrepha fraterculus isolate F2 alpha-amylase (amy) gene, partial cds	Amylase	KY923830
Amy-p	KY948027	F_0_03	Anastrepha fraterculus isolate F3 alpha-amylase (amy) gene, partial cds	Amylase	KY948027	F3	Anastrepha fraterculus isolate F3 alpha-amylase (amy) gene, partial cds	Amylase	KY948027	F3	Anastrepha fraterculus isolate F3 alpha-amylase (amy) gene, partial cds	Amylase	KY948027	F3	Anastrepha fraterculus isolate F3 alpha-amylase (amy) gene, partial cds	Amylase	KY948027	F3	Anastrepha fraterculus isolate F3 alpha-amylase (amy) gene, partial cds	Amylase	KY948027	F3	Anastrepha fraterculus isolate F3 alpha-amylase (amy) gene, partial cds	Amylase	KY948027	F3	Anastrepha fraterculus isolate F3 alpha-amylase (amy) gene, partial cds	Amylase	KY948027	F3	Anastrepha fraterculus isolate F3 alpha-amylase (amy) gene, partial cds	Amylase	KY948027	F3	Anastrepha fraterculus isolate F3 alpha-amylase (amy) gene, partial cds	Amylase	KY948027	F3	Anastrepha fraterculus isolate F3 alpha-amylase (amy) gene, partial cds	Amylase	KY948027	F3	Anastrepha fraterculus isolate F3 alpha-amylase (amy) gene, partial cds	Amylase	KY948027	F3	Anastrepha fraterculus isolate F3 alpha-amylase (amy) gene, partial cds	Amylase	KY948027
Amy-p	KY948024	F_0_04	Anastrepha fraterculus isolate F4 alpha-amylase (amy) gene, partial cds	Amylase	KY948024	F4	Anastrepha fraterculus isolate F4 alpha-amylase (amy) gene, partial cds	Amylase	KY948024	F4	Anastrepha fraterculus isolate F4 alpha-amylase (amy) gene, partial cds	Amylase	KY948024	F4	Anastrepha fraterculus isolate F4 alpha-amylase (amy) gene, partial cds	Amylase	KY948024	F4	Anastrepha fraterculus isolate F4 alpha-amylase (amy) gene, partial cds	Amylase	KY948024	F4	Anastrepha fraterculus isolate F4 alpha-amylase (amy) gene, partial cds	Amylase	KY948024	F4	Anastrepha fraterculus isolate F4 alpha-amylase (amy) gene, partial cds	Amylase	KY948024	F4	Anastrepha fraterculus isolate F4 alpha-amylase (amy) gene, partial cds	Amylase	KY948024	F4	Anastrepha fraterculus isolate F4 alpha-amylase (amy) gene, partial cds	Amylase	KY948024	F4	Anastrepha fraterculus isolate F4 alpha-amylase (amy) gene, partial cds	Amylase	KY948024	F4	Anastrepha fraterculus isolate F4 alpha-amylase (amy) gene, partial cds	Amylase	KY948024	F4	Anastrepha fraterculus isolate F4 alpha-amylase (amy) gene, partial cds	Amylase	KY948024
Amy-p	KY948035	F_0_05	Anastrepha fraterculus isolate F5 alpha-amylase (amy) gene, partial cds	Amylase	KY948035	F5	Anastrepha fraterculus isolate F5 alpha-amylase (amy) gene, partial cds	Amylase	KY948035	F5	Anastrepha fraterculus isolate F5 alpha-amylase (amy) gene, partial cds	Amylase	KY948035	F5	Anastrepha fraterculus isolate F5 alpha-amylase (amy) gene, partial cds	Amylase	KY948035	F5	Anastrepha fraterculus isolate F5 alpha-amylase (amy) gene, partial cds	Amylase	KY948035	F5	Anastrepha fraterculus isolate F5 alpha-amylase (amy) gene, partial cds	Amylase	KY948035	F5	Anastrepha fraterculus isolate F5 alpha-amylase (amy) gene, partial cds	Amylase	KY948035	F5	Anastrepha fraterculus isolate F5 alpha-amylase (amy) gene, partial cds	Amylase	KY948035	F5	Anastrepha fraterculus isolate F5 alpha-amylase (amy) gene, partial cds	Amylase	KY948035	F5	Anastrepha fraterculus isolate F5 alpha-amylase (amy) gene, partial cds	Amylase	KY948035	F5	Anastrepha fraterculus isolate F5 alpha-amylase (amy) gene, partial cds	Amylase	KY948035	F5	Anastrepha fraterculus isolate F5 alpha-amylase (amy) gene, partial cds	Amylase	KY948035
Amy-p	KY948038	F_0_06	Anastrepha fraterculus isolate F6 alpha-amylase (amy) gene, partial cds	Amylase	KY948038	F6	Anastrepha fraterculus isolate F6 alpha-amylase (amy) gene, partial cds	Amylase	KY948038	F6	Anastrepha fraterculus isolate F6 alpha-amylase (amy) gene, partial cds	Amylase	KY948038	F6	Anastrepha fraterculus isolate F6 alpha-amylase (amy) gene, partial cds	Amylase	KY948038	F6	Anastrepha fraterculus isolate F6 alpha-amylase (amy) gene, partial cds	Amylase	KY948038	F6	Anastrepha fraterculus isolate F6 alpha-amylase (amy) gene, partial cds	Amylase	KY948038	F6	Anastrepha fraterculus isolate F6 alpha-amylase (amy) gene, partial cds	Amylase	KY948038	F6	Anastrepha fraterculus isolate F6 alpha-amylase (amy) gene, partial cds	Amylase	KY948038	F6	Anastrepha fraterculus isolate F6 alpha-amylase (amy) gene, partial cds	Amylase	KY948038	F6	Anastrepha fraterculus isolate F6 alpha-amylase (amy) gene, partial cds	Amylase	KY948038	F6	Anastrepha fraterculus isolate F6 alpha-amylase (amy) gene, partial cds	Amylase	KY948038	F6	Anastrepha fraterculus isolate F6 alpha-amylase (amy) gene, partial cds	Amylase	KY948038
Amy-p	KY923815	F_0_07	Anastrepha fraterculus isolate F7 alpha-amylase (amy) gene, partial cds	Amylase	KY923815	F7	Anastrepha fraterculus isolate F7 alpha-amylase (amy) gene, partial cds	Amylase	KY923815	F7	Anastrepha fraterculus isolate F7 alpha-amylase (amy) gene, partial cds	Amylase	KY923815	F7	Anastrepha fraterculus isolate F7 alpha-amylase (amy) gene, partial cds	Amylase	KY923815	F7	Anastrepha fraterculus isolate F7 alpha-amylase (amy) gene, partial cds	Amylase	KY923815	F7	Anastrepha fraterculus isolate F7 alpha-amylase (amy) gene, partial cds	Amylase	KY923815	F7	Anastrepha fraterculus isolate F7 alpha-amylase (amy) gene, partial cds	Amylase	KY923815	F7	Anastrepha fraterculus isolate F7 alpha-amylase (amy) gene, partial cds	Amylase	KY923815	F7	Anastrepha fraterculus isolate F7 alpha-amylase (amy) gene, partial cds	Amylase	KY923815	F7	Anastrepha fraterculus isolate F7 alpha-amylase (amy) gene, partial cds	Amylase	KY923815	F7	Anastrepha fraterculus isolate F7 alpha-amylase (amy) gene, partial cds	Amylase	KY923815	F7	Anastrepha fraterculus isolate F7 alpha-amylase (amy) gene, partial cds	Amylase	KY923815
Amy-p	KY923816	F_0_08	Anastrepha fraterculus isolate F8 alpha-amylase (amy) gene, partial cds	Amylase	KY923816	F8	Anastrepha fraterculus isolate F8 alpha-amylase (amy) gene, partial cds	Amylase	KY923816	F8	Anastrepha fraterculus isolate F8 alpha-amylase (amy) gene, partial cds	Amylase	KY923816	F8	Anastrepha fraterculus isolate F8 alpha-amylase (amy) gene, partial cds	Amylase	KY923816	F8	Anastrepha fraterculus isolate F8 alpha-amylase (amy) gene, partial cds	Amylase	KY923816	F8	Anastrepha fraterculus isolate F8 alpha-amylase (amy) gene, partial cds	Amylase	KY923816	F8	Anastrepha fraterculus isolate F8 alpha-amylase (amy) gene, partial cds	Amylase	KY923816	F8	Anastrepha fraterculus isolate F8 alpha-amylase (amy) gene, partial cds	Amylase	KY923816	F8	Anastrepha fraterculus isolate F8 alpha-amylase (amy) gene, partial cds	Amylase	KY923816	F8	Anastrepha fraterculus isolate F8 alpha-amylase (amy) gene, partial cds	Amylase	KY923816	F8	Anastrepha fraterculus isolate F8 alpha-amylase (amy) gene, partial cds	Amylase	KY923816	F8	Anastrepha fraterculus isolate F8 alpha-amylase (amy) gene, partial cds	Amylase	KY923816
Amy-p	KY923817	F_0_09	Anastrepha fraterculus isolate F9 alpha-amylase (amy) gene, partial cds	Amylase	KY923817	F9	Anastrepha fraterculus isolate F9 alpha-amylase (amy) gene, partial cds	Amylase	KY923817	F9	Anastrepha fraterculus isolate F9 alpha-amylase (amy) gene, partial cds	Amylase	KY923817	F9	Anastrepha fraterculus isolate F9 alpha-amylase (amy) gene, partial cds	Amylase	KY923817	F9	Anastrepha fraterculus isolate F9 alpha-amylase (amy) gene, partial cds	Amylase	KY923817	F9	Anastrepha fraterculus isolate F9 alpha-amylase (amy) gene, partial cds	Amylase	KY923817	F9	Anastrepha fraterculus isolate F9 alpha-amylase (amy) gene, partial cds	Amylase	KY923817	F9	Anastrepha fraterculus isolate F9 alpha-amylase (amy) gene, partial cds	Amylase	KY923817	F9	Anastrepha fraterculus isolate F9 alpha-amylase (amy) gene, partial cds	Amylase	KY923817	F9	Anastrepha fraterculus isolate F9 alpha-amylase (amy) gene, partial cds	Amylase	KY923817	F9	Anastrepha fraterculus isolate F9 alpha-amylase (amy) gene, partial cds	Amylase	KY923817	F9	Anastrepha fraterculus isolate F9 alpha-amylase (amy) gene, partial cds	Amylase	KY923817
Amy-p	KY923818	F_0_10	Anastrepha fraterculus isolate F10 alpha-amylase (amy) gene, partial cds	Amylase	KY923818	F10	Anastrepha fraterculus isolate F10 alpha-amylase (amy) gene, partial cds	Amylase	KY923818	F10	Anastrepha fraterculus isolate F10 alpha-amylase (amy) gene, partial cds	Amylase	KY923818	F10	Anastrepha fraterculus isolate F10 alpha-amylase (amy) gene, partial cds	Amylase	KY923818	F10	Anastrepha fraterculus isolate F10 alpha-amylase (amy) gene, partial cds	Amylase	KY923818	F10	Anastrepha fraterculus isolate F10 alpha-amylase (amy) gene, partial cds	Amylase	KY923818	F10	Anastrepha fraterculus isolate F10 alpha-amylase (amy) gene, partial cds	Amylase	KY923818	F10	Anastrepha fraterculus isolate F10 alpha-amylase (amy) gene, partial cds	Amylase	KY923818	F10	Anastrepha fraterculus isolate F10 alpha-amylase (amy) gene, partial cds	Amylase	KY923818	F10	Anastrepha fraterculus isolate F10 alpha-amylase (amy) gene, partial cds	Amylase	KY923818	F10	Anastrepha fraterculus isolate F10 alpha-amylase (amy) gene, partial cds	Amylase	KY923818	F10	Anastrepha fraterculus isolate F10 alpha-amylase (amy) gene, partial cds	Amylase	KY923818
Amy-p	KY948028	F_0_11	Anastrepha fraterculus isolate F11 alpha-amylase (amy) gene, partial cds	Amylase	KY948028	F11	Anastrepha fraterculus isolate F11 alpha-amylase (amy) gene, partial cds	Amylase	KY948028	F11	Anastrepha fraterculus isolate F11 alpha-amylase (amy) gene, partial cds	Amylase	KY948028	F11	Anastrepha fraterculus isolate F11 alpha-amylase (amy) gene, partial cds	Amylase	KY948028	F11	Anastrepha fraterculus isolate F11 alpha-amylase (amy) gene, partial cds	Amylase	KY948028	F11	Anastrepha fraterculus isolate F11 alpha-amylase (amy) gene, partial cds	Amylase	KY948028	F11	Anastrepha fraterculus isolate F11 alpha-amylase (amy) gene, partial cds	Amylase	KY948028	F11	Anastrepha fraterculus isolate F11 alpha-amylase (amy) gene, partial cds	Amylase	KY948028	F11	Anastrepha fraterculus isolate F11 alpha-amylase (amy) gene, partial cds	Amylase	KY948028	F11	Anastrepha fraterculus isolate F11 alpha-amylase (amy) gene, partial cds	Amylase	KY948028	F11	Anastrepha fraterculus isolate F11 alpha-amylase (amy) gene, partial cds	Amylase	KY948028	F11	Anastrepha fraterculus isolate F11 alpha-amylase (amy) gene, partial cds	Amylase	KY948028
Amy-p	KY948036	F_0_12	Anastrepha fraterculus isolate F12 alpha-amylase (amy) gene, partial cds	Amylase	KY948036	F12	Anastrepha fraterculus isolate F12 alpha-amylase (amy) gene, partial cds	Amylase	KY948036	F12	Anastrepha fraterculus isolate F12 alpha-amylase (amy) gene, partial cds	Amylase	KY948036	F12	Anastrepha fraterculus isolate F12 alpha-amylase (amy) gene, partial cds	Amylase	KY948036	F12	Anastrepha fraterculus isolate F12 alpha-amylase (amy) gene, partial cds	Amylase	KY948036	F12	Anastrepha fraterculus isolate F12 alpha-amylase (amy) gene, partial cds	Amylase	KY948036	F12	Anastrepha fraterculus isolate F12 alpha-amylase (amy) gene, partial cds	Amylase	KY948036	F12	Anastrepha fraterculus isolate F12 alpha-amylase (amy) gene, partial cds	Amylase	KY948036	F12	Anastrepha fraterculus isolate F12 alpha-amylase (amy) gene, partial cds	Amylase	KY948036	F12	Anastrepha fraterculus isolate F12 alpha-amylase (amy) gene, partial cds	Amylase	KY948036	F12	Anastrepha fraterculus isolate F12 alpha-amylase (amy) gene, partial cds	Amylase	KY948036	F12	Anastrepha fraterculus isolate F12 alpha-amylase (amy) gene, partial cds	Amylase	KY948036
Amy-p	KY948029	F_0_13	Anastrepha fraterculus isolate F13 alpha-amylase (amy) gene, partial cds	Amylase	KY948029	F13	Anastrepha fraterculus isolate F13 alpha-amylase (amy) gene, partial cds	Amylase	KY948029	F13	Anastrepha fraterculus isolate F13 alpha-amylase (amy) gene, partial cds	Amylase	KY948029	F13	Anastrepha fraterculus isolate F13 alpha-amylase (amy) gene, partial cds	Amylase	KY948029	F13	Anastrepha fraterculus isolate F13 alpha-amylase (amy) gene, partial cds	Amylase	KY948029	F13	Anastrepha fraterculus isolate F13 alpha-amylase (amy) gene, partial cds	Amylase	KY948029	F13	Anastrepha fraterculus isolate F13 alpha-amylase (amy) gene, partial cds	Amylase	KY948029	F13	Anastrepha fraterculus isolate F13 alpha-amylase (amy) gene, partial cds	Amylase	KY948029	F13	Anastrepha fraterculus isolate F13 alpha-amylase (amy) gene, partial cds	Amylase	KY948029	F13	Anastrepha fraterculus isolate F13 alpha-amylase (amy) gene, partial cds	Amylase	KY948029	F13	Anastrepha fraterculus isolate F13 alpha-amylase (amy) gene, partial cds	Amylase	KY948029	F13	Anastrepha fraterculus isolate F13 alpha-amylase (amy) gene, partial cds	Amylase	KY948029
Amy-p	KY948030	F_0_14	Anastrepha fraterculus isolate F14 alpha-amylase (amy) gene, partial cds	Amylase	KY948030	F14	Anastrepha fraterculus isolate F14 alpha-amylase (amy) gene, partial cds	Amylase	KY948030	F14	Anastrepha fraterculus isolate F14 alpha-amylase (amy) gene, partial cds	Amylase	KY948030	F14	Anastrepha fraterculus isolate F14 alpha-amylase (amy) gene, partial cds	Amylase	KY948030	F14	Anastrepha fraterculus isolate F14 alpha-amylase (amy) gene, partial cds	Amylase	KY948030	F14	Anastrepha fraterculus isolate F14 alpha-amylase (amy) gene, partial cds	Amylase	KY948030	F14	Anastrepha fraterculus isolate F14 alpha-amylase (amy) gene, partial cds	Amylase	KY948030	F14	Anastrepha fraterculus isolate F14 alpha-amylase (amy) gene, partial cds	Amylase	KY948030	F14	Anastrepha fraterculus isolate F14 alpha-amylase (amy) gene, partial cds	Amylase	KY948030	F14	Anastrepha fraterculus isolate F14 alpha-amylase (amy) gene, partial cds	Amylase	KY948030	F14	Anastrepha fraterculus isolate F14 alpha-amylase (amy) gene, partial cds	Amylase	KY948030	F14	Anastrepha fraterculus isolate F14 alpha-amylase (amy) gene, partial cds	Amylase	KY948030
Amy-p	KY948031	F_0_15	Anastrepha fraterculus isolate F15 alpha-amylase (amy) gene, partial cds	Amylase	KY948031	F15	Anastrepha fraterculus isolate F15 alpha-amylase (amy) gene, partial cds	Amylase	KY948031	F15	Anastrepha fraterculus isolate F15 alpha-amylase (amy) gene, partial cds	Amylase	KY948031	F15	Anastrepha fraterculus isolate F15 alpha-amylase (amy) gene, partial cds	Amylase	KY948031	F15	Anastrepha fraterculus isolate F15 alpha-amylase (amy) gene, partial cds	Amylase	KY948031	F15	Anastrepha fraterculus isolate F15 alpha-amylase (amy) gene, partial cds	Amylase	KY948031	F15	Anastrepha fraterculus isolate F15 alpha-amylase (amy) gene, partial cds	Amylase	KY948031	F15	Anastrepha fraterculus isolate F15 alpha-amylase (amy) gene, partial cds	Amylase	KY948031	F15	Anastrepha fraterculus isolate F15 alpha-amylase (amy) gene, partial cds	Amylase	KY948031	F15	Anastrepha fraterculus isolate F15 alpha-amylase (amy) gene, partial cds	Amylase	KY948031	F15	Anastrepha fraterculus isolate F15 alpha-amylase (amy) gene, partial cds	Amylase	KY948031	F15	Anastrepha fraterculus isolate F15 alpha-amylase (amy) gene, partial cds	Amylase	KY948031
Amy-p	KY948032	F_0_16	Anastrepha fraterculus isolate F16 alpha-amylase (amy) gene, partial cds	Amylase	KY948032	F16	Anastrepha fraterculus isolate F16 alpha-amylase (amy) gene, partial cds	Amylase	KY948032	F16	Anastrepha fraterculus isolate F16 alpha-amylase (amy) gene, partial cds	Amylase	KY948032	F16	Anastrepha fraterculus isolate F16 alpha-amylase (amy) gene, partial cds	Amylase	KY948032	F16	Anastrepha fraterculus isolate F16 alpha-amylase (amy) gene, partial cds	Amylase	KY948032	F16	Anastrepha fraterculus isolate F16 alpha-amylase (amy) gene, partial cds	Amylase	KY948032	F16	Anastrepha fraterculus isolate F16 alpha-amylase (amy) gene, partial cds	Amylase	KY948032	F16	Anastrepha fraterculus isolate F16 alpha-amylase (amy) gene, partial cds	Amylase	KY948032	F16	Anastrepha fraterculus isolate F16 alpha-amylase (amy) gene, partial cds	Amylase	KY948032	F16	Anastrepha fraterculus isolate F16 alpha-amylase (amy) gene, partial cds	Amylase	KY948032	F16	Anastrepha fraterculus isolate F16 alpha-amylase (amy) gene, partial cds	Amylase	KY948032	F16	Anastrepha fraterculus isolate F16 alpha-amylase (amy) gene, partial cds	Amylase	KY948032
Amy-p	KY948033	F_0_17	Anastrepha fraterculus isolate F17 alpha-amylase (amy) gene, partial cds	Amylase	KY948033	F17	Anastrepha fraterculus isolate F17 alpha-amylase (amy) gene, partial cds	Amylase	KY948033	F17	Anastrepha fraterculus isolate F17 alpha-amylase (amy) gene, partial cds	Amylase	KY948033	F17	Anastrepha fraterculus isolate F17 alpha-amylase (amy) gene, partial cds	Amylase	KY948033	F17	Anastrepha fraterculus isolate F17 alpha-amylase (amy) gene, partial cds	Amylase	KY948033	F17	Anastrepha fraterculus isolate F17 alpha-amylase (amy) gene, partial cds	Amylase	KY948033	F17	Anastrepha fraterculus isolate F17 alpha-amylase (amy) gene, partial cds	Amylase	KY948033	F17	Anastrepha fraterculus isolate F17 alpha-amylase (amy) gene, partial cds	Amylase	KY948033	F17	Anastrepha fraterculus isolate F17 alpha-amylase (amy) gene, partial cds	Amylase	KY948033	F17	Anastrepha fraterculus isolate F17 alpha-amylase (amy) gene, partial cds	Amylase	KY948033	F17	Anastrepha fraterculus isolate F17 alpha-amylase (amy) gene, partial cds	Amylase	KY948033	F17	Anastrepha fraterculus isolate F17 alpha-amylase (amy) gene, partial cds	Amylase	KY948033
Amy-p	KY948034	F_0_18	Anastrepha fraterculus isolate F18 alpha-amylase (amy) gene, partial cds	Amylase	KY948034	F18	Anastrepha fraterculus isolate F18 alpha-amylase (amy) gene, partial cds	Amylase	KY948034	F18	Anastrepha fraterculus isolate F18 alpha-amylase (amy) gene, partial cds	Amylase	KY948034	F18	Anastrepha fraterculus isolate F18 alpha-amylase (amy) gene, partial cds	Amylase	KY948034	F18	Anastrepha fraterculus isolate F18 alpha-amylase (amy) gene, partial cds	Amylase	KY948034	F18	Anastrepha fraterculus isolate F18 alpha-amylase (amy) gene, partial cds	Amylase	KY948034	F18	Anastrepha fraterculus isolate F18 alpha-amylase (amy) gene, partial cds	Amylase	KY948034	F18	Anastrepha fraterculus isolate F18 alpha-amylase (amy) gene, partial cds	Amylase	KY948034	F18	Anastrepha fraterculus isolate F18 alpha-amylase (amy) gene, partial cds	Amylase	KY948034	F18	Anastrepha fraterculus isolate F18 alpha-amylase (amy) gene, partial cds	Amylase	KY948034	F18	Anastrepha fraterculus isolate F18 alpha-amylase (amy) gene, partial cds	Amylase	KY948034	F18	Anastrepha fraterculus isolate F18 alpha-amylase (amy) gene, partial cds	Amylase	KY948034
Amy-p	KY923819	F_0_19	Anastrepha fraterculus isolate F19 alpha-amylase (amy) gene, partial cds	Amylase	KY923819	F19	Anastrepha fraterculus isolate F19 alpha-amylase (amy) gene, partial cds	Amylase	KY923819	F19	Anastrepha fraterculus isolate F19 alpha-amylase (amy) gene, partial cds	Amylase	KY923819	F19	Anastrepha fraterculus isolate F19 alpha-amylase (amy) gene, partial cds	Amylase	KY923819	F19	Anastrepha fraterculus isolate F19 alpha-amylase (amy) gene, partial cds	Amylase	KY923819	F19	Anastrepha fraterculus isolate F19 alpha-amylase (amy) gene, partial cds	Amylase	KY923819	F19	Anastrepha fraterculus isolate F19 alpha-amylase (amy) gene, partial cds	Amylase	KY923819	F19	Anastrepha fraterculus isolate F19 alpha-amylase (amy) gene, partial cds	Amylase	KY923819	F19	Anastrepha fraterculus isolate F19 alpha-amylase (amy) gene, partial cds	Amylase	KY923819	F19	Anastrepha fraterculus isolate F19 alpha-amylase (amy) gene, partial cds	Amylase	KY923819	F19	Anastrepha fraterculus isolate F19 alpha-amylase (amy) gene, partial cds	Amylase	KY923819	F19	Anastrepha fraterculus isolate F19 alpha-amylase (amy) gene, partial cds	Amylase	KY923819
Amy-p	KY948025	F_0_20	Anastrepha fraterculus isolate F20 alpha-amylase (amy) gene, partial cds	Amylase	KY948025	F20	Anastrepha fraterculus isolate F20 alpha-amylase (amy) gene, partial cds	Amylase	KY948025	F20	Anastrepha fraterculus isolate F20 alpha-amylase (amy) gene, partial cds	Amylase	KY948025	F20	Anastrepha fraterculus isolate F20 alpha-amylase (amy) gene, partial cds	Amylase	KY948025	F20	Anastrepha fraterculus isolate F20 alpha-amylase (amy) gene, partial cds	Amylase	KY948025	F20	Anastrepha fraterculus isolate F20 alpha-amylase (amy) gene, partial cds	Amylase	KY948025	F20	Anastrepha fraterculus isolate F20 alpha-amylase (amy) gene, partial cds	Amylase	KY948025	F20	Anastrepha fraterculus isolate F20 alpha-amylase (amy) gene, partial cds	Amylase	KY948025	F20	Anastrepha fraterculus isolate F20 alpha-amylase (amy) gene, partial cds	Amylase	KY948025	F20	Anastrepha fraterculus isolate F20 alpha-amylase (amy) gene, partial cds	Amylase	KY948025	F20	Anastrepha fraterculus isolate F20 alpha-amylase (amy) gene, partial cds	Amylase	KY948025	F20	Anastrepha fraterculus isolate F20 alpha-amylase (amy) gene, partial cds	Amylase	KY948025
Amy-p	KY948026	F_0_21	Anastrepha fraterculus isolate F21 alpha-amylase (amy) gene, partial cds	Amylase	KY948026	F21	Anastrepha fraterculus isolate F21 alpha-amylase (amy) gene, partial cds	Amylase	KY948026	F21	Anastrepha fraterculus isolate F21 alpha-amylase (amy) gene, partial cds	Amylase	KY948026	F21	Anastrepha fraterculus isolate F21 alpha-amylase (amy) gene, partial cds	Amylase	KY948026	F21	Anastrepha fraterculus isolate F21 alpha-amylase (amy) gene, partial cds	Amylase	KY948026	F21	Anastrepha fraterculus isolate F21 alpha-amylase (amy) gene, partial cds	Amylase	KY948026	F21	Anastrepha fraterculus isolate F21 alpha-amylase (amy) gene, partial cds	Amylase	KY948026	F21	Anastrepha fraterculus isolate F21 alpha-amylase (amy) gene, partial cds	Amylase	KY948026	F21	Anastrepha fraterculus isolate F21 alpha-amylase (amy) gene, partial cds	Amylase	KY948026	F21	Anastrepha fraterculus isolate F21 alpha-amylase (amy) gene, partial cds	Amylase	KY948026	F21	Anastrepha fraterculus isolate F21 alpha-amylase (amy) gene, partial cds	Amylase	KY948026	F21	Anastrepha fraterculus isolate F21 alpha-amylase (amy) gene, partial cds	Amylase	KY948026
Amy-p	KY948037	F_0_22	Anastrepha fraterculus isolate F22 alpha-amylase (amy) gene, partial cds	Amylase	KY948037	F22	Anastrepha fraterculus isolate F22 alpha-amylase (amy) gene, partial cds	Amylase	KY948037	F22	Anastrepha fraterculus isolate F22 alpha-amylase (amy) gene, partial cds	Amylase	KY948037	F22	Anastrepha fraterculus isolate F22 alpha-amylase (amy) gene, partial cds	Amylase	KY948037	F22	Anastrepha fraterculus isolate F22 alpha-amylase (amy) gene, partial cds	Amylase	KY948037	F22	Anastrepha fraterculus isolate F22 alpha-amylase (amy) gene, partial cds	Amylase	KY948037	F22	Anastrepha fraterculus isolate F22 alpha-amylase (amy) gene, partial cds	Amylase	KY948037	F22	Anastrepha fraterculus isolate F22 alpha-amylase (amy) gene, partial cds	Amylase	KY948037	F22	Anastrepha fraterculus isolate F22 alpha-amylase (amy) gene, partial cds	Amylase	KY948037	F22	Anastrepha fraterculus isolate F22 alpha-amylase (amy) gene, partial cds	Amylase	KY948037	F22	Anastrepha fraterculus isolate F22 alpha-amylase (amy) gene, partial cds	Amylase	KY948037	F22	Anastrepha fraterculus isolate F22 alpha-amylase (amy) gene, partial cds	Amylase	KY948037
Amy-p	KY948039	O_0_01	Anastrepha obliqua isolate O1 alpha-amylase (amy) gene, partial cds	Amylase	KY948039	O1	Anastrepha obliqua isolate O1 alpha-amylase (amy) gene, partial cds	Amylase	KY948039	O1	Anastrepha obliqua isolate O1 alpha-amylase (amy) gene, partial cds	Amylase	KY948039	O1	Anastrepha obliqua isolate O1 alpha-amylase (amy) gene, partial cds	Amylase	KY948039	O1	Anastrepha obliqua isolate O1 alpha-amylase (amy) gene, partial cds	Amylase	KY948039	O1	Anastrepha obliqua isolate O1 alpha-amylase (amy) gene, partial cds	Amylase	KY948039	O1	Anastrepha obliqua isolate O1 alpha-amylase (amy) gene, partial cds	Amylase	KY948039	O1	Anastrepha obliqua isolate O1 alpha-amylase (amy) gene, partial cds	Amylase	KY948039	O1	Anastrepha obliqua isolate O1 alpha-amylase (amy) gene, partial cds	Amylase	KY948039	O1	Anastrepha obliqua isolate O1 alpha-amylase (amy) gene, partial cds	Amylase	KY948039	O1	Anastrepha obliqua isolate O1 alpha-amylase (amy) gene, partial cds	Amylase	KY948039	O1	Anastrepha obliqua isolate O1 alpha-amylase (amy) gene, partial cds	Amylase	KY948039
Amy-p	KY948049	O_0_02	Anastrepha obliqua isolate O2 alpha-amylase (amy) gene, partial cds	Amylase	KY948049	O2	Anastrepha obliqua isolate O2 alpha-amylase (amy) gene, partial cds	Amylase	KY948049	O2	Anastrepha obliqua isolate O2 alpha-amylase (amy) gene, partial cds	Amylase	KY948049	O2	Anastrepha obliqua isolate O2 alpha-amylase (amy) gene, partial cds	Amylase	KY948049	O2	Anastrepha obliqua isolate O2 alpha-amylase (amy) gene, partial cds	Amylase	KY948049	O2	Anastrepha obliqua isolate O2 alpha-amylase (amy) gene, partial cds	Amylase	KY948049	O2	Anastrepha obliqua isolate O2 alpha-amylase (amy) gene, partial cds	Amylase	KY948049	O2	Anastrepha obliqua isolate O2 alpha-amylase (amy) gene, partial cds	Amylase	KY948049	O2	Anastrepha obliqua isolate O2 alpha-amylase (amy) gene, partial cds	Amylase	KY948049	O2	Anastrepha obliqua isolate O2 alpha-amylase (amy) gene, partial cds	Amylase	KY948049	O2	Anastrepha obliqua isolate O2 alpha-amylase (amy) gene, partial cds	Amylase	KY948049	O2	Anastrepha obliqua isolate O2 alpha-amylase (amy) gene, partial cds	Amylase	KY948049
Amy-p	KY948050	O_0_03	Anastrepha obliqua isolate O3 alpha-amylase (amy) gene, partial cds	Amylase	KY948050	O3	Anastrepha obliqua isolate O3 alpha-amylase (amy) gene, partial cds	Amylase	KY948050	O3	Anastrepha obliqua isolate O3 alpha-amylase (amy) gene, partial cds	Amylase	KY948050	O3	Anastrepha obliqua isolate O3 alpha-amylase (amy) gene, partial cds	Amylase	KY948050	O3	Anastrepha obliqua isolate O3 alpha-amylase (amy) gene, partial cds	Amylase	KY948050	O3	Anastrepha obliqua isolate O3 alpha-amylase (amy) gene, partial cds	Amylase	KY948050	O3	Anastrepha obliqua isolate O3 alpha-amylase (amy) gene, partial cds	Amylase	KY948050	O3	Anastrepha obliqua isolate O3 alpha-amylase (amy) gene, partial cds	Amylase	KY948050	O3	Anastrepha obliqua isolate O3 alpha-amylase (amy) gene, partial cds	Amylase	KY948050	O3	Anastrepha obliqua isolate O3 alpha-amylase (amy) gene, partial cds	Amylase	KY948050	O3	Anastrepha obliqua isolate O3 alpha-amylase (amy) gene, partial cds	Amylase	KY948050	O3	Anastrepha obliqua isolate O3 alpha-amylase (amy) gene, partial cds	Amylase	KY948050
Amy-p	KY923820	O_0_04	Anastrepha obliqua isolate O4 alpha-amylase (amy) gene, partial cds	Amylase	KY923820	O4	Anastrepha obliqua isolate O4 alpha-amylase (amy) gene, partial cds	Amylase	KY923820	O4	Anastrepha obliqua isolate O4 alpha-amylase (amy) gene, partial cds	Amylase	KY923820	O4	Anastrepha obliqua isolate O4 alpha-amylase (amy) gene, partial cds	Amylase	KY923820	O4	Anastrepha obliqua isolate O4 alpha-amylase (amy) gene, partial cds	Amylase	KY923820	O4	Anastrepha obliqua isolate O4 alpha-amylase (amy) gene, partial cds	Amylase	KY923820	O4	Anastrepha obliqua isolate O4 alpha-amylase (amy) gene, partial cds	Amylase	KY923820	O4	Anastrepha obliqua isolate O4 alpha-amylase (amy) gene, partial cds	Amylase	KY923820	O4	Anastrepha obliqua isolate O4 alpha-amylase (amy) gene, partial cds	Amylase	KY923820	O4	Anastrepha obliqua isolate O4 alpha-amylase (amy) gene, partial cds	Amylase	KY923820	O4	Anastrepha obliqua isolate O4 alpha-amylase (amy) gene, partial cds	Amylase	KY923820	O4	Anastrepha obliqua isolate O4 alpha-amylase (amy) gene, partial cds	Amylase	KY923820
Amy-p	KY923821	O_0_05	Anastrepha obliqua isolate O5 alpha-amylase (amy) gene, partial cds	Amylase	KY923821	O5	Anastrepha obliqua isolate O5 alpha-amylase (amy) gene, partial cds	Amylase	KY923821	O5	Anastrepha obliqua isolate O5 alpha-amylase (amy) gene, partial cds	Amylase	KY923821	O5	Anastrepha obliqua isolate O5 alpha-amylase (amy) gene, partial cds	Amylase	KY923821	O5	Anastrepha obliqua isolate O5 alpha-amylase (amy) gene, partial cds	Amylase	KY923821	O5	Anastrepha obliqua isolate O5 alpha-amylase (amy) gene, partial cds	Amylase	KY923821	O5	Anastrepha obliqua isolate O5 alpha-amylase (amy) gene, partial cds	Amylase	KY923821	O5	Anastrepha obliqua isolate O5 alpha-amylase (amy) gene, partial cds	Amylase	KY923821	O5	Anastrepha obliqua isolate O5 alpha-amylase (amy) gene, partial cds	Amylase	KY923821	O5	Anastrepha obliqua isolate O5 alpha-amylase (amy) gene, partial cds	Amylase	KY923821	O5	Anastrepha obliqua isolate O5 alpha-amylase (amy) gene, partial cds	Amylase	KY923821	O5	Anastrepha obliqua isolate O5 alpha-amylase (amy) gene, partial cds	Amylase	KY923821
Amy-p	KY948051	O_0_06	Anastrepha obliqua isolate O6 alpha-amylase (amy) gene, partial cds	Amylase	KY948051	O6	Anastrepha obliqua isolate O6 alpha-amylase (amy) gene, partial cds	Amylase	KY948051	O6	Anastrepha obliqua isolate O6 alpha-amylase (amy) gene, partial cds	Amylase	KY948051	O6	Anastrepha obliqua isolate O6 alpha-amylase (amy) gene, partial cds	Amylase	KY948051	O6	Anastrepha obliqua isolate O6 alpha-amylase (amy) gene, partial cds	Amylase	KY948051	O6	Anastrepha obliqua isolate O6 alpha-amylase (amy) gene, partial cds	Amylase	KY948051	O6	Anastrepha obliqua isolate O6 alpha-amylase (amy) gene, partial cds	Amylase	KY948051	O6	Anastrepha obliqua isolate O6 alpha-amylase (amy) gene, partial cds	Amylase	KY948051	O6	Anastrepha obliqua isolate O6 alpha-amylase (amy) gene, partial cds	Amylase	KY948051	O6	Anastrepha obliqua isolate O6 alpha-amylase (amy) gene, partial cds	Amylase	KY948051	O6	Anastrepha obliqua isolate O6 alpha-amylase (amy) gene, partial cds	Amylase	KY948051	O6	Anastrepha obliqua isolate O6 alpha-amylase (amy) gene, partial cds	Amylase	KY948051
Amy-p	KY948052	O_0_07	Anastrepha obliqua isolate O7 alpha-amylase (amy) gene, partial cds	Amylase	KY948052	O7	Anastrepha obliqua isolate O7 alpha-amylase (amy) gene, partial cds	Amylase	KY948052	O7	Anastrepha obliqua isolate O7 alpha-amylase (amy) gene, partial cds	Amylase	KY948052	O7	Anastrepha obliqua isolate O7 alpha-amylase (amy) gene, partial cds	Amylase	KY948052	O7	Anastrepha obliqua isolate O7 alpha-amylase (amy) gene, partial cds	Amylase	KY948052	O7	Anastrepha obliqua isolate O7 alpha-amylase (amy) gene, partial cds	Amylase	KY948052	O7	Anastrepha obliqua isolate O7 alpha-amylase (amy) gene, partial cds	Amylase	KY948052	O7	Anastrepha obliqua isolate O7 alpha-amylase (amy) gene, partial cds	Amylase	KY948052	O7	Anastrepha obliqua isolate O7 alpha-amylase (amy) gene, partial cds	Amylase	KY948052	O7	Anastrepha obliqua isolate O7 alpha-amylase (amy) gene, partial cds	Amylase	KY948052	O7	Anastrepha obliqua isolate O7 alpha-amylase (amy) gene, partial cds	Amylase	KY948052	O7	Anastrepha obliqua isolate O7 alpha-amylase (amy) gene, partial cds	Amylase	KY948052
Amy-p	KY948053	O_0_08	Anastrepha obliqua isolate O8 alpha-amylase (amy) gene, partial cds	Amylase	KY948053	O8	Anastrepha obliqua isolate O8 alpha-amylase (amy) gene, partial cds	Amylase	KY948053	O8	Anastrepha obliqua isolate O8 alpha-amylase (amy) gene, partial cds	Amylase	KY948053	O8	Anastrepha obliqua isolate O8 alpha-amylase (amy) gene, partial cds	Amylase	KY948053	O8	Anastrepha obliqua isolate O8 alpha-amylase (amy) gene, partial cds	Amylase	KY948053	O8	Anastrepha obliqua isolate O8 alpha-amylase (amy) gene, partial cds	Amylase	KY948053	O8	Anastrepha obliqua isolate O8 alpha-amylase (amy) gene, partial cds	Amylase	KY948053	O8	Anastrepha obliqua isolate O8 alpha-amylase (amy) gene, partial cds	Amylase	KY948053	O8	Anastrepha obliqua isolate O8 alpha-amylase (amy) gene, partial cds	Amylase	KY948053	O8	Anastrepha obliqua isolate O8 alpha-amylase (amy) gene, partial cds	Amylase	KY948053	O8	Anastrepha obliqua isolate O8 alpha-amylase (amy) gene, partial cds	Amylase	KY948053	O8	Anastrepha obliqua isolate O8 alpha-amylase (amy) gene, partial cds	Amylase	KY948053
Amy-p	KY948054	O_0_09	Anastrepha obliqua isolate O9 alpha-amylase (amy) gene, partial cds	Amylase	KY948054	O9	Anastrepha obliqua isolate O9 alpha-amylase (amy) gene, partial cds	Amylase	KY948054	O9	Anastrepha obliqua isolate O9 alpha-amylase (amy) gene, partial cds	Amylase	KY948054	O9	Anastrepha obliqua isolate O9 alpha-amylase (amy) gene, partial cds	Amylase	KY948054	O9	Anastrepha obliqua isolate O9 alpha-amylase (amy) gene, partial cds	Amylase	KY948054	O9	Anastrepha obliqua isolate O9 alpha-amylase (amy) gene, partial cds	Amylase	KY948054	O9	Anastrepha obliqua isolate O9 alpha-amylase (amy) gene, partial cds	Amylase	KY948054	O9	Anastrepha obliqua isolate O9 alpha-amylase (amy) gene, partial cds	Amylase	KY948054	O9	Anastrepha obliqua isolate O9 alpha-amylase (amy) gene, partial cds	Amylase	KY948054	O9	Anastrepha obliqua isolate O9 alpha-amylase (amy) gene, partial cds	Amylase	KY948054	O9	Anastrepha obliqua isolate O9 alpha-amylase (amy) gene, partial cds	Amylase	KY948054	O9	Anastrepha obliqua isolate O9 alpha-amylase (amy) gene, partial cds	Amylase	KY948054
Amy-p	KY948040	O_0_10	Anastrepha obliqua isolate O10 alpha-amylase (amy) gene, partial cds	Amylase	KY948040	O10	Anastrepha obliqua isolate O10 alpha-amylase (amy) gene, partial cds	Amylase	KY948040	O10	Anastrepha obliqua isolate O10 alpha-amylase (amy) gene, partial cds	Amylase	KY948040	O10	Anastrepha obliqua isolate O10 alpha-amylase (amy) gene, partial cds	Amylase	KY948040	O10	Anastrepha obliqua isolate O10 alpha-amylase (amy) gene, partial cds	Amylase	KY948040	O10	Anastrepha obliqua isolate O10 alpha-amylase (amy) gene, partial cds	Amylase	KY948040	O10	Anastrepha obliqua isolate O10 alpha-amylase (amy) gene, partial cds	Amylase	KY948040	O10	Anastrepha obliqua isolate O10 alpha-amylase (amy) gene, partial cds	Amylase	KY948040	O10	Anastrepha obliqua isolate O10 alpha-amylase (amy) gene, partial cds	Amylase	KY948040	O10	Anastrepha obliqua isolate O10 alpha-amylase (amy) gene, partial cds	Amylase	KY948040	O10	Anastrepha obliqua isolate O10 alpha-amylase (amy) gene, partial cds	Amylase	KY948040	O10	Anastrepha obliqua isolate O10 alpha-amylase (amy) gene, partial cds	Amylase	KY948040
Amy-p	KY948041	O_0_11	Anastrepha obliqua isolate O11 alpha-amylase (amy) gene, partial cds	Amylase	KY948041	O11	Anastrepha obliqua isolate O11 alpha-amylase (amy) gene, partial cds	Amylase	KY948041	O11	Anastrepha obliqua isolate O11 alpha-amylase (amy) gene, partial cds	Amylase	KY948041	O11	Anastrepha obliqua isolate O11 alpha-amylase (amy) gene, partial cds	Amylase	KY948041	O11	Anastrepha obliqua isolate O11 alpha-amylase (amy) gene, partial cds	Amylase	KY948041	O11	Anastrepha obliqua isolate O11 alpha-amylase (amy) gene, partial cds	Amylase	KY948041	O11	Anastrepha obliqua isolate O11 alpha-amylase (amy) gene, partial cds	Amylase	KY948041	O11	Anastrepha obliqua isolate O11 alpha-amylase (amy) gene, partial cds	Amylase	KY948041	O11	Anastrepha obliqua isolate O11 alpha-amylase (amy) gene, partial cds	Amylase	KY948041	O11	Anastrepha obliqua isolate O11 alpha-amylase (amy) gene, partial cds	Amylase	KY948041	O11	Anastrepha obliqua isolate O11 alpha-amylase (amy) gene, partial cds	Amylase	KY948041	O11	Anastrepha obliqua isolate O11 alpha-amylase (amy) gene, partial cds	Amylase	KY948041
Amy-p	KY948055	O_0_12	Anastrepha obliqua isolate O12 alpha-amylase (amy) gene, partial cds	Amylase	KY948055	O12	Anastrepha obliqua isolate O12 alpha-amylase (amy) gene, partial cds	Amylase	KY948055	O12	Anastrepha obliqua isolate O12 alpha-amylase (amy) gene, partial cds	Amylase	KY948055	O12	Anastrepha obliqua isolate O12 alpha-amylase (amy) gene, partial cds	Amylase	KY948055	O12	Anastrepha obliqua isolate O12 alpha-amylase (amy) gene, partial cds	Amylase	KY948055	O12	Anastrepha obliqua isolate O12 alpha-amylase (amy) gene, partial cds	Amylase	KY948055	O12	Anastrepha obliqua isolate O12 alpha-amylase (amy) gene, partial cds	Amylase	KY948055	O12	Anastrepha obliqua isolate O12 alpha-amylase (amy) gene, partial cds	Amylase	KY948055	O12	Anastrepha obliqua isolate O12 alpha-amylase (amy) gene, partial cds	Amylase	KY948055	O12	Anastrepha obliqua isolate O12 alpha-amylase (amy) gene, partial cds	Amylase	KY948055	O12	Anastrepha obliqua isolate O12 alpha-amylase (amy) gene, partial cds	Amylase	KY948055	O12	Anastrepha obliqua isolate O12 alpha-amylase (amy) gene, partial cds	Amylase	KY948055
Amy-p	KY948042	O_0_13	Anastrepha obliqua isolate O13 alpha-amylase (amy) gene, partial cds	Amylase	KY948042	O13	Anastrepha obliqua isolate O13 alpha-amylase (amy) gene, partial cds	Amylase	KY948042	O13	Anastrepha obliqua isolate O13 alpha-amylase (amy) gene, partial cds	Amylase	KY948042	O13	Anastrepha obliqua isolate O13 alpha-amylase (amy) gene, partial cds	Amylase	KY948042	O13	Anastrepha obliqua isolate O13 alpha-amylase (amy) gene, partial cds	Amylase	KY948042	O13	Anastrepha obliqua isolate O13 alpha-amylase (amy) gene, partial cds	Amylase	KY948042	O13	Anastrepha obliqua isolate O13 alpha-amylase (amy) gene, partial cds	Amylase	KY948042	O13	Anastrepha obliqua isolate O13 alpha-amylase (amy) gene, partial cds	Amylase	KY948042	O13	Anastrepha obliqua isolate O13 alpha-amylase (amy) gene, partial cds	Amylase	KY948042	O13	Anastrepha obliqua isolate O13 alpha-amylase (amy) gene, partial cds	Amylase	KY948042	O13	Anastrepha obliqua isolate O13 alpha-amylase (amy) gene, partial cds	Amylase	KY948042	O13	Anastrepha obliqua isolate O13 alpha-amylase (amy) gene, partial cds	Amylase	KY948042
Amy-p	KY948056	O_0_14	Anastrepha obliqua isolate O14 alpha-amylase (amy) gene, partial cds	Amylase	KY948056	O14	Anastrepha obliqua isolate O14 alpha-amylase (amy) gene, partial cds	Amylase	KY948056	O14	Anastrepha obliqua isolate O14 alpha-amylase (amy) gene, partial cds	Amylase	KY948056	O14	Anastrepha obliqua isolate O14 alpha-amylase (amy) gene, partial cds	Amylase	KY948056	O14	Anastrepha obliqua isolate O14 alpha-amylase (amy) gene, partial cds	Amylase	KY948056	O14	Anastrepha obliqua isolate O14 alpha-amylase (amy) gene, partial cds	Amylase	KY948056	O14	Anastrepha obliqua isolate O14 alpha-amylase (amy) gene, partial cds	Amylase	KY948056	O14	Anastrepha obliqua isolate O14 alpha-amylase (amy) gene, partial cds	Amylase	KY948056	O14	Anastrepha obliqua isolate O14 alpha-amylase (amy) gene, partial cds	Amylase	KY948056	O14	Anastrepha obliqua isolate O14 alpha-amylase (amy) gene, partial cds	Amylase	KY948056	O14	Anastrepha obliqua isolate O14 alpha-amylase (amy) gene, partial cds	Amylase	KY948056	O14	Anastrepha obliqua isolate O14 alpha-amylase (amy) gene, partial cds	Amylase	KY948056
Amy-p	KY948043	O_0_15	Anastrepha obliqua isolate O15 alpha-amylase (amy) gene, partial cds	Amylase	KY948043	O15	Anastrepha obliqua isolate O15 alpha-amylase (amy) gene, partial cds	Amylase	KY948043	O15	Anastrepha obliqua isolate O15 alpha-amylase (amy) gene, partial cds	Amylase	KY948043	O15	Anastrepha obliqua isolate O15 alpha-amylase (amy) gene, partial cds	Amylase	KY948043	O15	Anastrepha obliqua isolate O15 alpha-amylase (amy) gene, partial cds	Amylase	KY948043	O15	Anastrepha obliqua isolate O15 alpha-amylase (amy) gene, partial cds	Amylase	KY948043	O15	Anastrepha obliqua isolate O15 alpha-amylase (amy) gene, partial cds	Amylase	KY948043	O15	Anastrepha obliqua isolate O15 alpha-amylase (amy) gene, partial cds	Amylase	KY948043	O15	Anastrepha obliqua isolate O15 alpha-amylase (amy) gene, partial cds	Amylase	KY948043	O15	Anastrepha obliqua isolate O15 alpha-amylase (amy) gene, partial cds	Amylase	KY948043	O15	Anastrepha obliqua isolate O15 alpha-amylase (amy) gene, partial cds	Amylase	KY948043	O15	Anastrepha obliqua isolate O15 alpha-amylase (amy) gene, partial cds	Amylase	KY948043
Amy-p	KY948044	O_0_16	Anastrepha obliqua isolate O16 alpha-amylase (amy) gene, partial cds	Amylase	KY948044	O16	Anastrepha obliqua isolate O16 alpha-amylase (amy) gene, partial cds	Amylase	KY948044	O16	Anastrepha obliqua isolate O16 alpha-amylase (amy) gene, partial cds	Amylase	KY948044	O16	Anastrepha obliqua isolate O16 alpha-amylase (amy) gene, partial cds	Amylase	KY948044	O16	Anastrepha obliqua isolate O16 alpha-amylase (amy) gene, partial cds	Amylase	KY948044	O16	Anastrepha obliqua isolate O16 alpha-amylase (amy) gene, partial cds	Amylase	KY948044	O16	Anastrepha obliqua isolate O16 alpha-amylase (amy) gene, partial cds	Amylase	KY948044	O16	Anastrepha obliqua isolate O16 alpha-amylase (amy) gene, partial cds	Amylase	KY948044	O16	Anastrepha obliqua isolate O16 alpha-amylase (amy) gene, partial cds	Amylase	KY948044	O16	Anastrepha obliqua isolate O16 alpha-amylase (amy) gene, partial cds	Amylase	KY948044	O16	Anastrepha obliqua isolate O16 alpha-amylase (amy) gene, partial cds	Amylase	KY948044	O16	Anastrepha obliqua isolate O16 alpha-amylase (amy) gene, partial cds	Amylase	KY948044
Amy-p	KY948045	O_0_17	Anastrepha obliqua isolate O17 alpha-amylase (amy) gene, partial cds	Amylase	KY948045	O17	Anastrepha obliqua isolate O17 alpha-amylase (amy) gene, partial cds	Amylase	KY948045	O17	Anastrepha obliqua isolate O17 alpha-amylase (amy) gene, partial cds	Amylase	KY948045	O17	Anastrepha obliqua isolate O17 alpha-amylase (amy) gene, partial cds	Amylase	KY948045	O17	Anastrepha obliqua isolate O17 alpha-amylase (amy) gene, partial cds	Amylase	KY948045	O17	Anastrepha obliqua isolate O17 alpha-amylase (amy) gene, partial cds	Amylase	KY948045	O17	Anastrepha obliqua isolate O17 alpha-amylase (amy) gene, partial cds	Amylase	KY948045	O17	Anastrepha obliqua isolate O17 alpha-amylase (amy) gene, partial cds	Amylase	KY948045	O17	Anastrepha obliqua isolate O17 alpha-amylase (amy) gene, partial cds	Amylase	KY948045	O17	Anastrepha obliqua isolate O17 alpha-amylase (amy) gene, partial cds	Amylase	KY948045	O17	Anastrepha obliqua isolate O17 alpha-amylase (amy) gene, partial cds	Amylase	KY948045	O17	Anastrepha obliqua isolate O17 alpha-amylase (amy) gene, partial cds	Amylase	KY948045
Amy-p	KY948046	O_0_18	Anastrepha obliqua isolate O18 alpha-amylase (amy) gene, partial cds	Amylase	KY948046	O18	Anastrepha obliqua isolate O18 alpha-amylase (amy) gene, partial cds	Amylase	KY948046	O18	Anastrepha obliqua isolate O18 alpha-amylase (amy) gene, partial cds	Amylase	KY948046	O18	Anastrepha obliqua isolate O18 alpha-amylase (amy) gene, partial cds	Amylase	KY948046	O18	Anastrepha obliqua isolate O18 alpha-amylase (amy) gene, partial cds	Amylase	KY948046	O18	Anastrepha obliqua isolate O18 alpha-amylase (amy) gene, partial cds	Amylase	KY948046	O18	Anastrepha obliqua isolate O18 alpha-amylase (amy) gene, partial cds	Amylase	KY948046	O18	Anastrepha obliqua isolate O18 alpha-amylase (amy) gene, partial cds	Amylase	KY948046	O18	Anastrepha obliqua isolate O18 alpha-amylase (amy) gene, partial cds	Amylase	KY948046	O18	Anastrepha obliqua isolate O18 alpha-amylase (amy) gene, partial cds	Amylase	KY948046	O18	Anastrepha obliqua isolate O18 alpha-amylase (amy) gene, partial cds	Amylase	KY948046	O18	Anastrepha obliqua isolate O18 alpha-amylase (amy) gene, partial cds	Amylase	KY948046
Amy-p	KY948047	O_0_19	Anastrepha obliqua isolate O19 alpha-amylase (amy) gene, partial cds	Amylase	KY948047	O19	Anastrepha obliqua isolate O19 alpha-amylase (amy) gene, partial cds	Amylase	KY948047	O19	Anastrepha obliqua isolate O19 alpha-amylase (amy) gene, partial cds	Amylase	KY948047	O19	Anastrepha obliqua isolate O19 alpha-amylase (amy) gene, partial cds	Amylase	KY948047	O19	Anastrepha obliqua isolate O19 alpha-amylase (amy) gene, partial cds	Amylase	KY948047	O19	Anastrepha obliqua isolate O19 alpha-amylase (amy) gene, partial cds	Amylase	KY948047	O19	Anastrepha obliqua isolate O19 alpha-amylase (amy) gene, partial cds	Amylase	KY948047	O19	Anastrepha obliqua isolate O19 alpha-amylase (amy) gene, partial cds	Amylase	KY948047	O19	Anastrepha obliqua isolate O19 alpha-amylase (amy) gene, partial cds	Amylase	KY948047	O19	Anastrepha obliqua isolate O19 alpha-amylase (amy) gene, partial cds	Amylase	KY948047	O19	Anastrepha obliqua isolate O19 alpha-amylase (amy) gene, partial cds	Amylase	KY948047	O19	Anastrepha obliqua isolate O19 alpha-amylase (amy) gene, partial cds	Amylase	KY948047
Amy-p	KY948048	O_0_20	Anastrepha obliqua isolate O20 alpha-amylase (amy) gene, partial cds	Amylase	KY948048	O20	Anastrepha obliqua isolate O20 alpha-amylase (amy) gene, partial cds	Amylase	KY948048	O20	Anastrepha obliqua isolate O20 alpha-amylase (amy) gene, partial cds	Amylase	KY948048	O20	Anastrepha obliqua isolate O20 alpha-amylase (amy) gene, partial cds	Amylase	KY948048	O20	Anastrepha obliqua isolate O20 alpha-amylase (amy) gene, partial cds	Amylase	KY948048	O20	Anastrepha obliqua isolate O20 alpha-amylase (amy) gene, partial cds	Amylase	KY948048	O20	Anastrepha obliqua isolate O20 alpha-amylase (amy) gene, partial cds	Amylase	KY948048	O20	Anastrepha obliqua isolate O20 alpha-amylase (amy) gene, partial cds	Amylase	KY948048	O20	Anastrepha obliqua isolate O20 alpha-amylase (amy) gene, partial cds	Amylase	KY948048	O20	Anastrepha obliqua isolate O20 alpha-amylase (amy) gene, partial cds	Amylase	KY948048	O20	Anastrepha obliqua isolate O20 alpha-amylase (amy) gene, partial cds	Amylase	KY948048	O20	Anastrepha obliqua isolate O20 alpha-amylase (amy) gene, partial cds	Amylase	KY948048
Amy-p	KY923822	S_0_01	Anastrepha sororcula isolate S1 alpha-amylase (amy) gene, partial cds	Amylase	KY923822	S1	Anastrepha sororcula isolate S1 alpha-amylase (amy) gene, partial cds	Amylase	KY923822	S1	Anastrepha sororcula isolate S1 alpha-amylase (amy) gene, partial cds	Amylase	KY923822	S1	Anastrepha sororcula isolate S1 alpha-amylase (amy) gene, partial cds	Amylase	KY923822	S1	Anastrepha sororcula isolate S1 alpha-amylase (amy) gene, partial cds	Amylase	KY923822	S1	Anastrepha sororcula isolate S1 alpha-amylase (amy) gene, partial cds	Amylase	KY923822	S1	Anastrepha sororcula isolate S1 alpha-amylase (amy) gene, partial cds	Amylase	KY923822	S1	Anastrepha sororcula isolate S1 alpha-amylase (amy) gene, partial cds	Amylase	KY923822	S1	Anastrepha sororcula isolate S1 alpha-amylase (amy) gene, partial cds	Amylase	KY923822	S1	Anastrepha sororcula isolate S1 alpha-amylase (amy) gene, partial cds	Amylase	KY923822	S1	Anastrepha sororcula isolate S1 alpha-amylase (amy) gene, partial cds	Amylase	KY923822	S1	Anastrepha sororcula isolate S1 alpha-amylase (amy) gene, partial cds	Amylase	KY923822
Amy-p	KY948057	S_0_02	Anastrepha sororcula isolate S2 alpha-amylase (amy) gene, partial cds	Amylase	KY948057	S2	Anastrepha sororcula isolate S2 alpha-amylase (amy) gene, partial cds	Amylase	KY948057	S2	Anastrepha sororcula isolate S2 alpha-amylase (amy) gene, partial cds	Amylase	KY948057	S2	Anastrepha sororcula isolate S2 alpha-amylase (amy) gene, partial cds	Amylase	KY948057	S2	Anastrepha sororcula isolate S2 alpha-amylase (amy) gene, partial cds	Amylase	KY948057	S2	Anastrepha sororcula isolate S2 alpha-amylase (amy) gene, partial cds	Amylase	KY948057	S2	Anastrepha sororcula isolate S2 alpha-amylase (amy) gene, partial cds	Amylase	KY948057	S2	Anastrepha sororcula isolate S2 alpha-amylase (amy) gene, partial cds	Amylase	KY948057	S2	Anastrepha sororcula isolate S2 alpha-amylase (amy) gene, partial cds	Amylase	KY948057	S2	Anastrepha sororcula isolate S2 alpha-amylase (amy) gene, partial cds	Amylase	KY948057	S2	Anastrepha sororcula isolate S2 alpha-amylase (amy) gene, partial cds	Amylase	KY948057	S2	Anastrepha sororcula isolate S2 alpha-amylase (amy) gene, partial cds	Amylase	KY948057
Amy-p	KY923823	S_0_03	Anastrepha sororcula isolate S3 alpha-amylase (amy) gene, partial cds	Amylase	KY923823	S3	Anastrepha sororcula isolate S3 alpha-amylase (amy) gene, partial cds	Amylase	KY923823	S3	Anastrepha sororcula isolate S3 alpha-amylase (amy) gene, partial cds	Amylase	KY923823	S3	Anastrepha sororcula isolate S3 alpha-amylase (amy) gene, partial cds	Amylase	KY923823	S3	Anastrepha sororcula isolate S3 alpha-amylase (amy) gene, partial cds	Amylase	KY923823	S3	Anastrepha sororcula isolate S3 alpha-amylase (amy) gene, partial cds	Amylase	KY923823	S3	Anastrepha sororcula isolate S3 alpha-amylase (amy) gene, partial cds	Amylase	KY923823	S3	Anastrepha sororcula isolate S3 alpha-amylase (amy) gene, partial cds	Amylase	KY923823	S3	Anastrepha sororcula isolate S3 alpha-amylase (amy) gene, partial cds	Amylase	KY923823	S3	Anastrepha sororcula isolate S3 alpha-amylase (amy) gene, partial cds	Amylase	KY923823	S3	Anastrepha sororcula isolate S3 alpha-amylase (amy) gene, partial cds	Amylase	KY923823	S3	Anastrepha sororcula isolate S3 alpha-amylase (amy) gene, partial cds	Amylase	KY923823
Amy-p	KY948058	S_0_04	Anastrepha sororcula isolate S4 alpha-amylase (amy) gene, partial cds	Amylase	KY948058	S4	Anastrepha sororcula isolate S4 alpha-amylase (amy) gene, partial cds	Amylase	KY948058	S4	Anastrepha sororcula isolate S4 alpha-amylase (amy) gene, partial cds	Amylase	KY948058	S4	Anastrepha sororcula isolate S4 alpha-amylase (amy) gene, partial cds	Amylase	KY948058	S4	Anastrepha sororcula isolate S4 alpha-amylase (amy) gene, partial cds	Amylase	KY948058	S4	Anastrepha sororcula isolate S4 alpha-amylase (amy) gene, partial cds	Amylase	KY948058	S4	Anastrepha sororcula isolate S4 alpha-amylase (amy) gene, partial cds	Amylase	KY948058	S4	Anastrepha sororcula isolate S4 alpha-amylase (amy) gene, partial cds	Amylase	KY948058	S4	Anastrepha sororcula isolate S4 alpha-amylase (amy) gene, partial cds	Amylase	KY948058	S4	Anastrepha sororcula isolate S4 alpha-amylase (amy) gene, partial cds	Amylase	KY948058	S4	Anastrepha sororcula isolate S4 alpha-amylase (amy) gene, partial cds	Amylase	KY948058	S4	Anastrepha sororcula isolate S4 alpha-amylase (amy) gene, partial cds	Amylase	KY948058
Amy-p	KY923824	S_0_05	Anastrepha sororcula isolate S5 alpha-amylase (amy) gene, partial cds	Amylase	KY923824	S5	Anastrepha sororcula isolate S5 alpha-amylase (amy) gene, partial cds	Amylase	KY923824	S5	Anastrepha sororcula isolate S5 alpha-amylase (amy) gene, partial cds	Amylase	KY923824	S5	Anastrepha sororcula isolate S5 alpha-amylase (amy) gene, partial cds	Amylase	KY923824	S5	Anastrepha sororcula isolate S5 alpha-amylase (amy) gene, partial cds	Amylase	KY923824	S5	Anastrepha sororcula isolate S5 alpha-amylase (amy) gene, partial cds	Amylase	KY923824	S5	Anastrepha sororcula isolate S5 alpha-amylase (amy) gene, partial cds	Amylase	KY923824	S5	Anastrepha sororcula isolate S5 alpha-amylase (amy) gene, partial cds	Amylase	KY923824	S5	Anastrepha sororcula isolate S5 alpha-amylase (amy) gene, partial cds	Amylase	KY923824	S5	Anastrepha sororcula isolate S5 alpha-amylase (amy) gene, partial cds	Amylase	KY923824	S5	Anastrepha sororcula isolate S5 alpha-amylase (amy) gene, partial cds	Amylase	KY923824	S5	Anastrepha sororcula isolate S5 alpha-amylase (amy) gene, partial cds	Amylase	KY923824
Amy-p	KY923825	S_0_06	Anastrepha sororcula isolate S6 alpha-amylase (amy) gene, partial cds	Amylase	KY923825	S6	Anastrepha sororcula isolate S6 alpha-amylase (amy) gene, partial cds	Amylase	KY923825	S6	Anastrepha sororcula isolate S6 alpha-amylase (amy) gene, partial cds	Amylase	KY923825	S6	Anastrepha sororcula isolate S6 alpha-amylase (amy) gene, partial cds	Amylase	KY923825	S6	Anastrepha sororcula isolate S6 alpha-amylase (amy) gene, partial cds	Amylase	KY923825	S6	Anastrepha sororcula isolate S6 alpha-amylase (amy) gene, partial cds	Amylase	KY923825	S6	Anastrepha sororcula isolate S6 alpha-amylase (amy) gene, partial cds	Amylase	KY923825	S6	Anastrepha sororcula isolate S6 alpha-amylase (amy) gene, partial cds	Amylase	KY923825	S6	Anastrepha sororcula isolate S6 alpha-amylase (amy) gene, partial cds	Amylase	KY923825	S6	Anastrepha sororcula isolate S6 alpha-amylase (amy) gene, partial cds	Amylase	KY923825	S6	Anastrepha sororcula isolate S6 alpha-amylase (amy) gene, partial cds	Amylase	KY923825	S6	Anastrepha sororcula isolate S6 alpha-amylase (amy) gene, partial cds	Amylase	KY923825
Amy-p	KY923826	S_0_07	Anastrepha sororcula isolate S7 alpha-amylase (amy) gene, partial cds	Amylase	KY923826	S7	Anastrepha sororcula isolate S7 alpha-amylase (amy) gene, partial cds	Amylase	KY923826	S7	Anastrepha sororcula isolate S7 alpha-amylase (amy) gene, partial cds	Amylase	KY923826	S7	Anastrepha sororcula isolate S7 alpha-amylase (amy) gene, partial cds	Amylase	KY923826	S7	Anastrepha sororcula isolate S7 alpha-amylase (amy) gene, partial cds	Amylase	KY923826	S7	Anastrepha sororcula isolate S7 alpha-amylase (amy) gene, partial cds	Amylase	KY923826	S7	Anastrepha sororcula isolate S7 alpha-amylase (amy) gene, partial cds	Amylase	KY923826	S7	Anastrepha sororcula isolate S7 alpha-amylase (amy) gene, partial cds	Amylase	KY923826	S7	Anastrepha sororcula isolate S7 alpha-amylase (amy) gene, partial cds	Amylase	KY923826	S7	Anastrepha sororcula isolate S7 alpha-amylase (amy) gene, partial cds	Amylase	KY923826	S7	Anastrepha sororcula isolate S7 alpha-amylase (amy) gene, partial cds	Amylase	KY923826	S7	Anastrepha sororcula isolate S7 alpha-amylase (amy) gene, partial cds	Amylase	KY923826
Amy-p	KY923827	S_0_08	Anastrepha sororcula isolate S8 alpha-amylase (amy) gene, partial cds	Amylase	KY923827	S8	Anastrepha sororcula isolate S8 alpha-amylase (amy) gene, partial cds	Amylase	KY923827	S8	Anastrepha sororcula isolate S8 alpha-amylase (amy) gene, partial cds	Amylase	KY923827	S8	Anastrepha sororcula isolate S8 alpha-amylase (amy) gene, partial cds	Amylase	KY923827	S8	Anastrepha sororcula isolate S8 alpha-amylase (amy) gene, partial cds	Amylase	KY923827	S8	Anastrepha sororcula isolate S8 alpha-amylase (amy) gene, partial cds	Amylase	KY923827	S8	Anastrepha sororcula isolate S8 alpha-amylase (amy) gene, partial cds	Amylase	KY923827	S8	Anastrepha sororcula isolate S8 alpha-amylase (amy) gene, partial cds	Amylase	KY923827	S8	Anastrepha sororcula isolate S8 alpha-amylase (amy) gene, partial cds	Amylase	KY923827	S8	Anastrepha sororcula isolate S8 alpha-amylase (amy) gene, partial cds	Amylase	KY923827	S8	Anastrepha sororcula isolate S8 alpha-amylase (amy) gene, partial cds	Amylase	KY923827	S8	Anastrepha sororcula isolate S8 alpha-amylase (amy) gene, partial cds	Amylase	KY923827
Amy-p	KY923828	S_0_09	Anastrepha sororcula isolate S9 alpha-amylase (amy) gene, partial cds	Amylase	KY923828	S9	Anastrepha sororcula isolate S9 alpha-amylase (amy) gene, partial cds	Amylase	KY923828	S9	Anastrepha sororcula isolate S9 alpha-amylase (amy) gene, partial cds	Amylase	KY923828	S9	Anastrepha sororcula isolate S9 alpha-amylase (amy) gene, partial cds	Amylase	KY923828	S9	Anastrepha sororcula isolate S9 alpha-amylase (amy) gene, partial cds	Amylase	KY923828	S9	Anastrepha sororcula isolate S9 alpha-amylase (amy) gene, partial cds	Amylase	KY923828	S9	Anastrepha sororcula isolate S9 alpha-amylase (amy) gene, partial cds	Amylase	KY923828	S9	Anastrepha sororcula isolate S9 alpha-amylase (amy) gene, partial cds	Amylase	KY923828	S9	Anastrepha sororcula isolate S9 alpha-amylase (amy) gene, partial cds	Amylase	KY923828	S9	Anastrepha sororcula isolate S9 alpha-amylase (amy) gene, partial cds	Amylase	KY923828	S9	Anastrepha sororcula isolate S9 alpha-amylase (amy) gene, partial cds	Amylase	KY923828	S9	Anastrepha sororcula isolate S9 alpha-amylase (amy) gene, partial cds	Amylase	KY923828
Amy-p	KY948059	S_0_10	Anastrepha sororcula isolate S10 alpha-amylase (amy) gene, partial cds	Amylase	KY948059	S10	Anastrepha sororcula isolate S10 alpha-amylase (amy) gene, partial cds	Amylase	KY948059	S10	Anastrepha sororcula isolate S10 alpha-amylase (amy) gene, partial cds	Amylase	KY948059	S10	Anastrepha sororcula isolate S10 alpha-amylase (amy) gene, partial cds	Amylase	KY948059	S10	Anastrepha sororcula isolate S10 alpha-amylase (amy) gene, partial cds	Amylase	KY948059	S10	Anastrepha sororcula isolate S10 alpha-amylase (amy) gene, partial cds	Amylase	KY948059	S10	Anastrepha sororcula isolate S10 alpha-amylase (amy) gene, partial cds	Amylase	KY948059	S10	Anastrepha sororcula isolate S10 alpha-amylase (amy) gene, partial cds	Amylase	KY948059	S10	Anastrepha sororcula isolate S10 alpha-amylase (amy) gene, partial cds	Amylase	KY948059	S10	Anastrepha sororcula isolate S10 alpha-amylase (amy) gene, partial cds	Amylase	KY948059	S10	Anastrepha sororcula isolate S10 alpha-amylase (amy) gene, partial cds	Amylase	KY948059	S10	Anastrepha sororcula isolate S10 alpha-amylase (amy) gene, partial cds	Amylase	KY948059
Amy-p	KY948060	S_0_11	Anastrepha sororcula isolate S11 alpha-amylase (amy) gene, partial cds	Amylase	KY948060	S11	Anastrepha sororcula isolate S11 alpha-amylase (amy) gene, partial cds	Amylase	KY948060	S11	Anastrepha sororcula isolate S11 alpha-amylase (amy) gene, partial cds	Amylase	KY948060	S11	Anastrepha sororcula isolate S11 alpha-amylase (amy) gene, partial cds	Amylase	KY948060	S11	Anastrepha sororcula isolate S11 alpha-amylase (amy) gene, partial cds	Amylase	KY948060	S11	Anastrepha sororcula isolate S11 alpha-amylase (amy) gene, partial cds	Amylase	KY948060	S11	Anastrepha sororcula isolate S11 alpha-amylase (amy) gene, partial cds	Amylase	KY948060	S11	Anastrepha sororcula isolate S11 alpha-amylase (amy) gene, partial cds	Amylase	KY948060	S11	Anastrepha sororcula isolate S11 alpha-amylase (amy) gene, partial cds	Amylase	KY948060	S11	Anastrepha sororcula isolate S11 alpha-amylase (amy) gene, partial cds	Amylase	KY948060	S11	Anastrepha sororcula isolate S11 alpha-amylase (amy) gene, partial cds	Amylase	KY948060	S11	Anastrepha sororcula isolate S11 alpha-amylase (amy) gene, partial cds	Amylase	KY948060
Amy-p	KY948061	S_0_12	Anastrepha sororcula isolate S12 alpha-amylase (amy) gene, partial cds	Amylase	KY948061	S12	Anastrepha sororcula isolate S12 alpha-amylase (amy) gene, partial cds	Amylase	KY948061	S12	Anastrepha sororcula isolate S12 alpha-amylase (amy) gene, partial cds	Amylase	KY948061	S12	Anastrepha sororcula isolate S12 alpha-amylase (amy) gene, partial cds	Amylase	KY948061	S12	Anastrepha sororcula isolate S12 alpha-amylase (amy) gene, partial cds	Amylase	KY948061	S12	Anastrepha sororcula isolate S12 alpha-amylase (amy) gene, partial cds	Amylase	KY948061	S12	Anastrepha sororcula isolate S12 alpha-amylase (amy) gene, partial cds	Amylase	KY948061	S12	Anastrepha sororcula isolate S12 alpha-amylase (amy) gene, partial cds	Amylase	KY948061	S12	Anastrepha sororcula isolate S12 alpha-amylase (amy) gene, partial cds	Amylase	KY948061	S12	Anastrepha sororcula isolate S12 alpha-amylase (amy) gene, partial cds	Amylase	KY948061	S12	Anastrepha sororcula isolate S12 alpha-amylase (amy) gene, partial cds	Amylase	KY948061	S12	Anastrepha sororcula isolate S12 alpha-amylase (amy) gene, partial cds	Amylase	KY948061
Amy-p	KY948062	S_0_13	Anastrepha sororcula isolate S13 alpha-amylase (amy) gene, partial cds	Amylase	KY948062	S13	Anastrepha sororcula isolate S13 alpha-amylase (amy) gene, partial cds	Amylase	KY948062	S13	Anastrepha sororcula isolate S13 alpha-amylase (amy) gene, partial cds	Amylase	KY948062	S13	Anastrepha sororcula isolate S13 alpha-amylase (amy) gene, partial cds	Amylase	KY948062	S13	Anastrepha sororcula isolate S13 alpha-amylase (amy) gene, partial cds	Amylase	KY948062	S13	Anastrepha sororcula isolate S13 alpha-amylase (amy) gene, partial cds	Amylase	KY948062	S13	Anastrepha sororcula isolate S13 alpha-amylase (amy) gene, partial cds	Amylase	KY948062	S13	Anastrepha sororcula isolate S13 alpha-amylase (amy) gene, partial cds	Amylase	KY948062	S13	Anastrepha sororcula isolate S13 alpha-amylase (amy) gene, partial cds	Amylase	KY948062	S13	Anastrepha sororcula isolate S13 alpha-amylase (amy) gene, partial cds	Amylase	KY948062	S13	Anastrepha sororcula isolate S13 alpha-amylase (amy) gene, partial cds	Amylase	KY948062	S13	Anastrepha sororcula isolate S13 alpha-amylase (amy) gene, partial cds	Amylase	KY948062
Amy-p	KY948063	S_0_14	Anastrepha sororcula isolate S14 alpha-amylase (amy) gene, partial cds	Amylase	KY948063	S14	Anastrepha sororcula isolate S14 alpha-amylase (amy) gene, partial cds	Amylase	KY948063	S14	Anastrepha sororcula isolate S14 alpha-amylase (amy) gene, partial cds	Amylase	KY948063	S14	Anastrepha sororcula isolate S14 alpha-amylase (amy) gene, partial cds	Amylase	KY948063	S14	Anastrepha sororcula isolate S14 alpha-amylase (amy) gene, partial cds	Amylase	KY948063	S14	Anastrepha sororcula isolate S14 alpha-amylase (amy) gene, partial cds	Amylase	KY948063	S14	Anastrepha sororcula isolate S14 alpha-amylase (amy) gene, partial cds	Amylase	KY948063	S14	Anastrepha sororcula isolate S14 alpha-amylase (amy) gene, partial cds	Amylase	KY948063	S14	Anastrepha sororcula isolate S14 alpha-amylase (amy) gene, partial cds	Amylase	KY948063	S14	Anastrepha sororcula isolate S14 alpha-amylase (amy) gene, partial cds	Amylase	KY948063	S14	Anastrepha sororcula isolate S14 alpha-amylase (amy) gene, partial cds	Amylase	KY948063	S14	Anastrepha sororcula isolate S14 alpha-amylase (amy) gene, partial cds	Amylase	KY948063
Amy-p	KY948064	S_0_15	Anastrepha sororcula isolate S15 alpha-amylase (amy) gene, partial cds	Amylase	KY948064	S15	Anastrepha sororcula isolate S15 alpha-amylase (amy) gene, partial cds	Amylase	KY948064	S15	Anastrepha sororcula isolate S15 alpha-amylase (amy) gene, partial cds	Amylase	KY948064	S15	Anastrepha sororcula isolate S15 alpha-amylase (amy) gene, partial cds	Amylase	KY948064	S15	Anastrepha sororcula isolate S15 alpha-amylase (amy) gene, partial cds	Amylase	KY948064	S15	Anastrepha sororcula isolate S15 alpha-amylase (amy) gene, partial cds	Amylase	KY948064	S15	Anastrepha sororcula isolate S15 alpha-amylase (amy) gene, partial cds	Amylase	KY948064	S15	Anastrepha sororcula isolate S15 alpha-amylase (amy) gene, partial cds	Amylase	KY948064	S15	Anastrepha sororcula isolate S15 alpha-amylase (amy) gene, partial cds	Amylase	KY948064	S15	Anastrepha sororcula isolate S15 alpha-amylase (amy) gene, partial cds	Amylase	KY948064	S15	Anastrepha sororcula isolate S15 alpha-amylase (amy) gene, partial cds	Amylase	KY948064	S15	Anastrepha sororcula isolate S15 alpha-amylase (amy) gene, partial cds	Amylase	KY948064
Amy-p	KY948065	S_0_16	Anastrepha sororcula isolate S16 alpha-amylase (amy) gene, partial cds	Amylase	KY948065	S16	Anastrepha sororcula isolate S16 alpha-amylase (amy) gene, partial cds	Amylase	KY948065	S16	Anastrepha sororcula isolate S16 alpha-amylase (amy) gene, partial cds	Amylase	KY948065	S16	Anastrepha sororcula isolate S16 alpha-amylase (amy) gene, partial cds	Amylase	KY948065	S16	Anastrepha sororcula isolate S16 alpha-amylase (amy) gene, partial cds	Amylase	KY948065	S16	Anastrepha sororcula isolate S16 alpha-amylase (amy) gene, partial cds	Amylase	KY948065	S16	Anastrepha sororcula isolate S16 alpha-amylase (amy) gene, partial cds	Amylase	KY948065	S16	Anastrepha sororcula isolate S16 alpha-amylase (amy) gene, partial cds	Amylase	KY948065	S16	Anastrepha sororcula isolate S16 alpha-amylase (amy) gene, partial cds	Amylase	KY948065	S16	Anastrepha sororcula isolate S16 alpha-amylase (amy) gene, partial cds	Amylase	KY948065	S16	Anastrepha sororcula isolate S16 alpha-amylase (amy) gene, partial cds	Amylase	KY948065	S16	Anastrepha sororcula isolate S16 alpha-amylase (amy) gene, partial cds	Amylase	KY948065
Amy-p	KY948066	S_0_17	Anastrepha sororcula isolate S17 alpha-amylase (amy) gene, partial cds	Amylase	KY948066	S17	Anastrepha sororcula isolate S17 alpha-amylase (amy) gene, partial cds	Amylase	KY948066	S17	Anastrepha sororcula isolate S17 alpha-amylase (amy) gene, partial cds	Amylase	KY948066	S17	Anastrepha sororcula isolate S17 alpha-amylase (amy) gene, partial cds	Amylase	KY948066	S17	Anastrepha sororcula isolate S17 alpha-amylase (amy) gene, partial cds	Amylase	KY948066	S17	Anastrepha sororcula isolate S17 alpha-amylase (amy) gene, partial cds	Amylase	KY948066	S17	Anastrepha sororcula isolate S17 alpha-amylase (amy) gene, partial cds	Amylase	KY948066	S17	Anastrepha sororcula isolate S17 alpha-amylase (amy) gene, partial cds	Amylase	KY948066	S17	Anastrepha sororcula isolate S17 alpha-amylase (amy) gene, partial cds	Amylase	KY948066	S17	Anastrepha sororcula isolate S17 alpha-amylase (amy) gene, partial cds	Amylase	KY948066	S17	Anastrepha sororcula isolate S17 alpha-amylase (amy) gene, partial cds	Amylase	KY948066	S17	Anastrepha sororcula isolate S17 alpha-amylase (amy) gene, partial cds	Amylase	KY948066
Amy-p	KY923829	S_0_18	Anastrepha sororcula isolate S18 alpha-amylase (amy) gene, partial cds	Amylase	KY923829	S18	Anastrepha sororcula isolate S18 alpha-amylase (amy) gene, partial cds	Amylase	KY923829	S18	Anastrepha sororcula isolate S18 alpha-amylase (amy) gene, partial cds	Amylase	KY923829	S18	Anastrepha sororcula isolate S18 alpha-amylase (amy) gene, partial cds	Amylase	KY923829	S18	Anastrepha sororcula isolate S18 alpha-amylase (amy) gene, partial cds	Amylase	KY923829	S18	Anastrepha sororcula isolate S18 alpha-amylase (amy) gene, partial cds	Amylase	KY923829	S18	Anastrepha sororcula isolate S18 alpha-amylase (amy) gene, partial cds	Amylase	KY923829	S18	Anastrepha sororcula isolate S18 alpha-amylase (amy) gene, partial cds	Amylase	KY923829	S18	Anastrepha sororcula isolate S18 alpha-amylase (amy) gene, partial cds	Amylase	KY923829	S18	Anastrepha sororcula isolate S18 alpha-amylase (amy) gene, partial cds	Amylase	KY923829	S18	Anastrepha sororcula isolate S18 alpha-amylase (amy) gene, partial cds	Amylase	KY923829	S18	Anastrepha sororcula isolate S18 alpha-amylase (amy) gene, partial cds	Amylase	KY923829
CG5220	KY066491	F_0_01	[organism=Anastrepha fraterculus] PREDICTED Anastrepha fraterculus putative tRNA (cytidine (32)/guanosine (34)-2'-O)-methyltransferase 1, partial CDS
CG5220	KY066492	F_0_02	[organism=Anastrepha fraterculus] PREDICTED Anastrepha fraterculus putative tRNA (cytidine (32)/guanosine (34)-2'-O)-methyltransferase 1, partial CDS
CG5220	KY066493	F_0_03	[organism=Anastrepha fraterculus] PREDICTED Anastrepha fraterculus putative tRNA (cytidine (32)/guanosine (34)-2'-O)-methyltransferase 1, partial CDS
CG5220	KY066494	F_0_04	[organism=Anastrepha fraterculus] PREDICTED Anastrepha fraterculus putative tRNA (cytidine (32)/guanosine (34)-2'-O)-methyltransferase 1, partial CDS
CG5220	KY066495	F_0_05	[organism=Anastrepha fraterculus] PREDICTED Anastrepha fraterculus putative tRNA (cytidine (32)/guanosine (34)-2'-O)-methyltransferase 1, partial CDS
CG5220	KY066496	F_0_06	[organism=Anastrepha fraterculus] PREDICTED Anastrepha fraterculus putative tRNA (cytidine (32)/guanosine (34)-2'-O)-methyltransferase 1, partial CDS
CG5220	KY066497	F_0_07	[organism=Anastrepha fraterculus] PREDICTED Anastrepha fraterculus putative tRNA (cytidine (32)/guanosine (34)-2'-O)-methyltransferase 1, partial CDS
CG5220	KY066498	F_0_08	[organism=Anastrepha fraterculus] PREDICTED Anastrepha fraterculus putative tRNA (cytidine (32)/guanosine (34)-2'-O)-methyltransferase 1, partial CDS
CG5220	KY066499	F_0_09	[organism=Anastrepha fraterculus] PREDICTED Anastrepha fraterculus putative tRNA (cytidine (32)/guanosine (34)-2'-O)-methyltransferase 1, partial CDS
CG5220	KY066500	F_0_10	[organism=Anastrepha fraterculus] PREDICTED Anastrepha fraterculus putative tRNA (cytidine (32)/guanosine (34)-2'-O)-methyltransferase 1, partial CDS
CG5220	KY066501	F_0_11	[organism=Anastrepha fraterculus] PREDICTED Anastrepha fraterculus putative tRNA (cytidine (32)/guanosine (34)-2'-O)-methyltransferase 1, partial CDS
CG5220	KY066502	F_0_12	[organism=Anastrepha fraterculus] PREDICTED Anastrepha fraterculus putative tRNA (cytidine (32)/guanosine (34)-2'-O)-methyltransferase 1, partial CDS
CG5220	KY066503	F_0_13	[organism=Anastrepha fraterculus] PREDICTED Anastrepha fraterculus putative tRNA (cytidine (32)/guanosine (34)-2'-O)-methyltransferase 1, partial CDS
CG5220	KY066504	F_0_14	[organism=Anastrepha fraterculus] PREDICTED Anastrepha fraterculus putative tRNA (cytidine (32)/guanosine (34)-2'-O)-methyltransferase 1, partial CDS
CG5220	KY066505	F_0_15	[organism=Anastrepha fraterculus] PREDICTED Anastrepha fraterculus putative tRNA (cytidine (32)/guanosine (34)-2'-O)-methyltransferase 1, partial CDS
CG5220	KY066506	F_0_16	[organism=Anastrepha fraterculus] PREDICTED Anastrepha fraterculus putative tRNA (cytidine (32)/guanosine (34)-2'-O)-methyltransferase 1, partial CDS
CG5220	KY066507	F_0_17	[organism=Anastrepha fraterculus] PREDICTED Anastrepha fraterculus putative tRNA (cytidine (32)/guanosine (34)-2'-O)-methyltransferase 1, partial CDS
CG5220	KY066508	F_0_18	[organism=Anastrepha fraterculus] PREDICTED Anastrepha fraterculus putative tRNA (cytidine (32)/guanosine (34)-2'-O)-methyltransferase 1, partial CDS
CG5220	KY066509	F_0_19	[organism=Anastrepha fraterculus] PREDICTED Anastrepha fraterculus putative tRNA (cytidine (32)/guanosine (34)-2'-O)-methyltransferase 1, partial CDS
CG5220	KY066510	F_0_20	[organism=Anastrepha fraterculus] PREDICTED Anastrepha fraterculus putative tRNA (cytidine (32)/guanosine (34)-2'-O)-methyltransferase 1, partial CDS
CG5220	KY066511	O_0_01	[organism=Anastrepha obliqua] PREDICTED Anastrepha obliqua putative tRNA (cytidine (32)/guanosine (34)-2'-O)-methyltransferase 1, partial CDS
CG5220	KY066512	O_0_02	[organism=Anastrepha obliqua] PREDICTED Anastrepha obliqua putative tRNA (cytidine (32)/guanosine (34)-2'-O)-methyltransferase 1, partial CDS
CG5220	KY066513	O_0_03	[organism=Anastrepha obliqua] PREDICTED Anastrepha obliqua putative tRNA (cytidine (32)/guanosine (34)-2'-O)-methyltransferase 1, partial CDS
CG5220	KY066514	O_0_04	[organism=Anastrepha obliqua] PREDICTED Anastrepha obliqua putative tRNA (cytidine (32)/guanosine (34)-2'-O)-methyltransferase 1, partial CDS
CG5220	KY066515	O_0_05	[organism=Anastrepha obliqua] PREDICTED Anastrepha obliqua putative tRNA (cytidine (32)/guanosine (34)-2'-O)-methyltransferase 1, partial CDS
CG5220	KY066516	O_0_06	[organism=Anastrepha obliqua] PREDICTED Anastrepha obliqua putative tRNA (cytidine (32)/guanosine (34)-2'-O)-methyltransferase 1, partial CDS
CG5220	KY066517	O_0_07	[organism=Anastrepha obliqua] PREDICTED Anastrepha obliqua putative tRNA (cytidine (32)/guanosine (34)-2'-O)-methyltransferase 1, partial CDS
CG5220	KY066518	O_0_08	[organism=Anastrepha obliqua] PREDICTED Anastrepha obliqua putative tRNA (cytidine (32)/guanosine (34)-2'-O)-methyltransferase 1, partial CDS
CG5220	KY066519	O_0_09	[organism=Anastrepha obliqua] PREDICTED Anastrepha obliqua putative tRNA (cytidine (32)/guanosine (34)-2'-O)-methyltransferase 1, partial CDS
CG5220	KY066520	O_0_10	[organism=Anastrepha obliqua] PREDICTED Anastrepha obliqua putative tRNA (cytidine (32)/guanosine (34)-2'-O)-methyltransferase 1, partial CDS
CG5220	KY066521	O_0_11	[organism=Anastrepha obliqua] PREDICTED Anastrepha obliqua putative tRNA (cytidine (32)/guanosine (34)-2'-O)-methyltransferase 1, partial CDS
CG5220	KY066522	O_0_12	[organism=Anastrepha obliqua] PREDICTED Anastrepha obliqua putative tRNA (cytidine (32)/guanosine (34)-2'-O)-methyltransferase 1, partial CDS
CG5220	KY066523	O_0_13	[organism=Anastrepha obliqua] PREDICTED Anastrepha obliqua putative tRNA (cytidine (32)/guanosine (34)-2'-O)-methyltransferase 1, partial CDS
CG5220	KY066524	O_0_14	[organism=Anastrepha obliqua] PREDICTED Anastrepha obliqua putative tRNA (cytidine (32)/guanosine (34)-2'-O)-methyltransferase 1, partial CDS
CG5220	KY066525	O_0_15	[organism=Anastrepha obliqua] PREDICTED Anastrepha obliqua putative tRNA (cytidine (32)/guanosine (34)-2'-O)-methyltransferase 1, partial CDS
CG5220	KY066526	O_0_16	[organism=Anastrepha obliqua] PREDICTED Anastrepha obliqua putative tRNA (cytidine (32)/guanosine (34)-2'-O)-methyltransferase 1, partial CDS
CG5220	KY066527	O_0_17	[organism=Anastrepha obliqua] PREDICTED Anastrepha obliqua putative tRNA (cytidine (32)/guanosine (34)-2'-O)-methyltransferase 1, partial CDS
CG5220	KY066528	O_0_18	[organism=Anastrepha obliqua] PREDICTED Anastrepha obliqua putative tRNA (cytidine (32)/guanosine (34)-2'-O)-methyltransferase 1, partial CDS
CG5220	KY066529	O_0_19	[organism=Anastrepha obliqua] PREDICTED Anastrepha obliqua putative tRNA (cytidine (32)/guanosine (34)-2'-O)-methyltransferase 1, partial CDS
CG5220	KY066530	O_0_20	[organism=Anastrepha obliqua] PREDICTED Anastrepha obliqua putative tRNA (cytidine (32)/guanosine (34)-2'-O)-methyltransferase 1, partial CDS
CG5220	KY066531	S_0_01	[organism=Anastrepha sororcula] PREDICTED Anastrepha sororcula putative tRNA (cytidine (32)/guanosine (34)-2'-O)-methyltransferase 1, partial CDS
CG5220	KY066532	S_0_02	[organism=Anastrepha sororcula] PREDICTED Anastrepha sororcula putative tRNA (cytidine (32)/guanosine (34)-2'-O)-methyltransferase 1, partial CDS
CG5220	KY066533	S_0_03	[organism=Anastrepha sororcula] PREDICTED Anastrepha sororcula putative tRNA (cytidine (32)/guanosine (34)-2'-O)-methyltransferase 1, partial CDS
CG5220	KY066534	S_0_04	[organism=Anastrepha sororcula] PREDICTED Anastrepha sororcula putative tRNA (cytidine (32)/guanosine (34)-2'-O)-methyltransferase 1, partial CDS
CG5220	KY066535	S_0_05	[organism=Anastrepha sororcula] PREDICTED Anastrepha sororcula putative tRNA (cytidine (32)/guanosine (34)-2'-O)-methyltransferase 1, partial CDS
CG5220	KY066536	S_0_06	[organism=Anastrepha sororcula] PREDICTED Anastrepha sororcula putative tRNA (cytidine (32)/guanosine (34)-2'-O)-methyltransferase 1, partial CDS
CG5220	KY066537	S_0_07	[organism=Anastrepha sororcula] PREDICTED Anastrepha sororcula putative tRNA (cytidine (32)/guanosine (34)-2'-O)-methyltransferase 1, partial CDS
CG5220	KY066538	S_0_08	[organism=Anastrepha sororcula] PREDICTED Anastrepha sororcula putative tRNA (cytidine (32)/guanosine (34)-2'-O)-methyltransferase 1, partial CDS
CG5220	KY066539	S_0_09	[organism=Anastrepha sororcula] PREDICTED Anastrepha sororcula putative tRNA (cytidine (32)/guanosine (34)-2'-O)-methyltransferase 1, partial CDS
CG5220	KY066540	S_0_10	[organism=Anastrepha sororcula] PREDICTED Anastrepha sororcula putative tRNA (cytidine (32)/guanosine (34)-2'-O)-methyltransferase 1, partial CDS
CG5220	KY066541	S_0_11	[organism=Anastrepha sororcula] PREDICTED Anastrepha sororcula putative tRNA (cytidine (32)/guanosine (34)-2'-O)-methyltransferase 1, partial CDS
CG5220	KY066542	S_0_12	[organism=Anastrepha sororcula] PREDICTED Anastrepha sororcula putative tRNA (cytidine (32)/guanosine (34)-2'-O)-methyltransferase 1, partial CDS
CG5220	KY066543	S_0_13	[organism=Anastrepha sororcula] PREDICTED Anastrepha sororcula putative tRNA (cytidine (32)/guanosine (34)-2'-O)-methyltransferase 1, partial CDS
CG5220	KY066544	S_0_14	[organism=Anastrepha sororcula] PREDICTED Anastrepha sororcula putative tRNA (cytidine (32)/guanosine (34)-2'-O)-methyltransferase 1, partial CDS
CG5220	KY066545	S_0_15	[organism=Anastrepha sororcula] PREDICTED Anastrepha sororcula putative tRNA (cytidine (32)/guanosine (34)-2'-O)-methyltransferase 1, partial CDS
CG5220	KY066546	S_0_16	[organism=Anastrepha sororcula] PREDICTED Anastrepha sororcula putative tRNA (cytidine (32)/guanosine (34)-2'-O)-methyltransferase 1, partial CDS
CG5220	KY066547	S_0_17	[organism=Anastrepha sororcula] PREDICTED Anastrepha sororcula putative tRNA (cytidine (32)/guanosine (34)-2'-O)-methyltransferase 1, partial CDS
CG5220	KY066548	S_0_18	[organism=Anastrepha sororcula] PREDICTED Anastrepha sororcula putative tRNA (cytidine (32)/guanosine (34)-2'-O)-methyltransferase 1, partial CDS
CG5220	KY066549	S_0_19	[organism=Anastrepha sororcula] PREDICTED Anastrepha sororcula putative tRNA (cytidine (32)/guanosine (34)-2'-O)-methyltransferase 1, partial CDS
CG5220	KY066550	S_0_20	[organism=Anastrepha sororcula] PREDICTED Anastrepha sororcula putative tRNA (cytidine (32)/guanosine (34)-2'-O)-methyltransferase 1, partial CDS
CG5325 / Pex19	KY066551	F_0_01	[organism=Anastrepha fraterculus] PREDICTED: Anastrepha fraterculus peroxisomal biogenesis factor 19, Partial CDS
CG5325 / Pex19	KY066552	F_0_02	[organism=Anastrepha fraterculus] PREDICTED: Anastrepha fraterculus peroxisomal biogenesis factor 19, Partial CDS
CG5325 / Pex19	KY066553	F_0_03	[organism=Anastrepha fraterculus] PREDICTED: Anastrepha fraterculus peroxisomal biogenesis factor 19, Partial CDS
CG5325 / Pex19	KY066554	F_0_04	[organism=Anastrepha fraterculus] PREDICTED: Anastrepha fraterculus peroxisomal biogenesis factor 19, Partial CDS
CG5325 / Pex19	KY066555	F_0_05	[organism=Anastrepha fraterculus] PREDICTED: Anastrepha fraterculus peroxisomal biogenesis factor 19, Partial CDS
CG5325 / Pex19	KY066556	F_0_06	[organism=Anastrepha fraterculus] PREDICTED: Anastrepha fraterculus peroxisomal biogenesis factor 19, Partial CDS
CG5325 / Pex19	KY066557	F_0_07	[organism=Anastrepha fraterculus] PREDICTED: Anastrepha fraterculus peroxisomal biogenesis factor 19, Partial CDS
CG5325 / Pex19	KY066558	F_0_08	[organism=Anastrepha fraterculus] PREDICTED: Anastrepha fraterculus peroxisomal biogenesis factor 19, Partial CDS
CG5325 / Pex19	KY066559	F_0_09	[organism=Anastrepha fraterculus] PREDICTED: Anastrepha fraterculus peroxisomal biogenesis factor 19, Partial CDS
CG5325 / Pex19	KY066560	F_0_10	[organism=Anastrepha fraterculus] PREDICTED: Anastrepha fraterculus peroxisomal biogenesis factor 19, Partial CDS
CG5325 / Pex19	KY066561	F_0_11	[organism=Anastrepha fraterculus] PREDICTED: Anastrepha fraterculus peroxisomal biogenesis factor 19, Partial CDS
CG5325 / Pex19	KY066562	F_0_12	[organism=Anastrepha fraterculus] PREDICTED: Anastrepha fraterculus peroxisomal biogenesis factor 19, Partial CDS
CG5325 / Pex19	KY066563	F_0_13	[organism=Anastrepha fraterculus] PREDICTED: Anastrepha fraterculus peroxisomal biogenesis factor 19, Partial CDS
CG5325 / Pex19	KY066564	F_0_14	[organism=Anastrepha fraterculus] PREDICTED: Anastrepha fraterculus peroxisomal biogenesis factor 19, Partial CDS
CG5325 / Pex19	KY066565	F_0_15	[organism=Anastrepha fraterculus] PREDICTED: Anastrepha fraterculus peroxisomal biogenesis factor 19, Partial CDS
CG5325 / Pex19	KY066566	F_0_16	[organism=Anastrepha fraterculus] PREDICTED: Anastrepha fraterculus peroxisomal biogenesis factor 19, Partial CDS
CG5325 / Pex19	KY066567	F_0_17	[organism=Anastrepha fraterculus] PREDICTED: Anastrepha fraterculus peroxisomal biogenesis factor 19, Partial CDS
CG5325 / Pex19	KY066568	F_0_18	[organism=Anastrepha fraterculus] PREDICTED: Anastrepha fraterculus peroxisomal biogenesis factor 19, Partial CDS
CG5325 / Pex19	KY066569	F_0_19	[organism=Anastrepha fraterculus] PREDICTED: Anastrepha fraterculus peroxisomal biogenesis factor 19, Partial CDS
CG5325 / Pex19	KY066570	F_0_20	[organism=Anastrepha fraterculus] PREDICTED: Anastrepha fraterculus peroxisomal biogenesis factor 19, Partial CDS
CG5325 / Pex19	KY066571	O_0_01	[organism=Anastrepha obliqua] PREDICTED: Anastrepha obliqua peroxisomal biogenesis factor 19, Partial CDS
CG5325 / Pex19	KY066572	O_0_02	[organism=Anastrepha obliqua] PREDICTED: Anastrepha obliqua peroxisomal biogenesis factor 19, Partial CDS
CG5325 / Pex19	KY066573	O_0_03	[organism=Anastrepha obliqua] PREDICTED: Anastrepha obliqua peroxisomal biogenesis factor 19, Partial CDS
CG5325 / Pex19	KY066574	O_0_04	[organism=Anastrepha obliqua] PREDICTED: Anastrepha obliqua peroxisomal biogenesis factor 19, Partial CDS
CG5325 / Pex19	KY066575	O_0_05	[organism=Anastrepha obliqua] PREDICTED: Anastrepha obliqua peroxisomal biogenesis factor 19, Partial CDS
CG5325 / Pex19	KY066576	O_0_06	[organism=Anastrepha obliqua] PREDICTED: Anastrepha obliqua peroxisomal biogenesis factor 19, Partial CDS
CG5325 / Pex19	KY066577	O_0_07	[organism=Anastrepha obliqua] PREDICTED: Anastrepha obliqua peroxisomal biogenesis factor 19, Partial CDS
CG5325 / Pex19	KY066578	O_0_08	[organism=Anastrepha obliqua] PREDICTED: Anastrepha obliqua peroxisomal biogenesis factor 19, Partial CDS
CG5325 / Pex19	KY066579	O_0_09	[organism=Anastrepha obliqua] PREDICTED: Anastrepha obliqua peroxisomal biogenesis factor 19, Partial CDS
CG5325 / Pex19	KY066580	O_0_10	[organism=Anastrepha obliqua] PREDICTED: Anastrepha obliqua peroxisomal biogenesis factor 19, Partial CDS
CG5325 / Pex19	KY066581	O_0_11	[organism=Anastrepha obliqua] PREDICTED: Anastrepha obliqua peroxisomal biogenesis factor 19, Partial CDS
CG5325 / Pex19	KY066582	O_0_12	[organism=Anastrepha obliqua] PREDICTED: Anastrepha obliqua peroxisomal biogenesis factor 19, Partial CDS
CG5325 / Pex19	KY066583	O_0_13	[organism=Anastrepha obliqua] PREDICTED: Anastrepha obliqua peroxisomal biogenesis factor 19, Partial CDS
CG5325 / Pex19	KY066584	O_0_14	[organism=Anastrepha obliqua] PREDICTED: Anastrepha obliqua peroxisomal biogenesis factor 19, Partial CDS
CG5325 / Pex19	KY066585	O_0_15	[organism=Anastrepha obliqua] PREDICTED: Anastrepha obliqua peroxisomal biogenesis factor 19, Partial CDS
CG5325 / Pex19	KY066586	O_0_16	[organism=Anastrepha obliqua] PREDICTED: Anastrepha obliqua peroxisomal biogenesis factor 19, Partial CDS
CG5325 / Pex19	KY066587	O_0_17	[organism=Anastrepha obliqua] PREDICTED: Anastrepha obliqua peroxisomal biogenesis factor 19, Partial CDS
CG5325 / Pex19	KY066588	O_0_18	[organism=Anastrepha obliqua] PREDICTED: Anastrepha obliqua peroxisomal biogenesis factor 19, Partial CDS
CG5325 / Pex19	KY066589	O_0_19	[organism=Anastrepha obliqua] PREDICTED: Anastrepha obliqua peroxisomal biogenesis factor 19, Partial CDS
CG5325 / Pex19	KY066590	O_0_20	[organism=Anastrepha obliqua] PREDICTED: Anastrepha obliqua peroxisomal biogenesis factor 19, Partial CDS
CG5325 / Pex19	KY066591	O_0_21	[organism=Anastrepha obliqua] PREDICTED: Anastrepha obliqua peroxisomal biogenesis factor 19, Partial CDS
CG5325 / Pex19	KY066592	O_0_22	[organism=Anastrepha obliqua] PREDICTED: Anastrepha obliqua peroxisomal biogenesis factor 19, Partial CDS
CG5325 / Pex19	KY066593	O_0_23	[organism=Anastrepha obliqua] PREDICTED: Anastrepha obliqua peroxisomal biogenesis factor 19, Partial CDS
CG5325 / Pex19	KY066594	O_0_24	[organism=Anastrepha obliqua] PREDICTED: Anastrepha obliqua peroxisomal biogenesis factor 19, Partial CDS
CG5325 / Pex19	KY066595	O_0_25	[organism=Anastrepha obliqua] PREDICTED: Anastrepha obliqua peroxisomal biogenesis factor 19, Partial CDS
CG5325 / Pex19	KY066596	S_0_01	[organism=Anastrepha sororcula] PREDICTED: Anastrepha sororcula peroxisomal biogenesis factor 19, Partial CDS
CG5325 / Pex19	KY066597	S_0_02	[organism=Anastrepha sororcula] PREDICTED: Anastrepha sororcula peroxisomal biogenesis factor 19, Partial CDS
CG5325 / Pex19	KY066598	S_0_03	[organism=Anastrepha sororcula] PREDICTED: Anastrepha sororcula peroxisomal biogenesis factor 19, Partial CDS
CG5325 / Pex19	KY066599	S_0_04	[organism=Anastrepha sororcula] PREDICTED: Anastrepha sororcula peroxisomal biogenesis factor 19, Partial CDS
CG5325 / Pex19	KY066600	S_0_05	[organism=Anastrepha sororcula] PREDICTED: Anastrepha sororcula peroxisomal biogenesis factor 19, Partial CDS
CG5325 / Pex19	KY066601	S_0_06	[organism=Anastrepha sororcula] PREDICTED: Anastrepha sororcula peroxisomal biogenesis factor 19, Partial CDS
CG5325 / Pex19	KY066602	S_0_07	[organism=Anastrepha sororcula] PREDICTED: Anastrepha sororcula peroxisomal biogenesis factor 19, Partial CDS
CG5325 / Pex19	KY066603	S_0_08	[organism=Anastrepha sororcula] PREDICTED: Anastrepha sororcula peroxisomal biogenesis factor 19, Partial CDS
CG5325 / Pex19	KY066604	S_0_09	[organism=Anastrepha sororcula] PREDICTED: Anastrepha sororcula peroxisomal biogenesis factor 19, Partial CDS
CG5325 / Pex19	KY066605	S_0_10	[organism=Anastrepha sororcula] PREDICTED: Anastrepha sororcula peroxisomal biogenesis factor 19, Partial CDS
CG5325 / Pex19	KY066606	S_0_11	[organism=Anastrepha sororcula] PREDICTED: Anastrepha sororcula peroxisomal biogenesis factor 19, Partial CDS
CG5325 / Pex19	KY066607	S_0_12	[organism=Anastrepha sororcula] PREDICTED: Anastrepha sororcula peroxisomal biogenesis factor 19, Partial CDS
CG5325 / Pex19	KY066608	S_0_13	[organism=Anastrepha sororcula] PREDICTED: Anastrepha sororcula peroxisomal biogenesis factor 19, Partial CDS
CG5325 / Pex19	KY066609	S_0_14	[organism=Anastrepha sororcula] PREDICTED: Anastrepha sororcula peroxisomal biogenesis factor 19, Partial CDS
CG6956 /Lcp65Ac	KY066685	F_0_01	[organism=Anastrepha fraterculus] PREDICTED: Anastrepha fraterculus larval cuticle protein 8, Complete CDS
CG6956 /Lcp65Ac	KY066686	F_0_02	[organism=Anastrepha fraterculus] PREDICTED: Anastrepha fraterculus larval cuticle protein 8, Complete CDS
CG6956 /Lcp65Ac	KY066687	F_0_03	[organism=Anastrepha fraterculus] PREDICTED: Anastrepha fraterculus larval cuticle protein 8, Complete CDS
CG6956 /Lcp65Ac	KY066688	F_0_04	[organism=Anastrepha fraterculus] PREDICTED: Anastrepha fraterculus larval cuticle protein 8, Complete CDS
CG6956 /Lcp65Ac	KY066689	F_0_05	[organism=Anastrepha fraterculus] PREDICTED: Anastrepha fraterculus larval cuticle protein 8, Complete CDS
CG6956 /Lcp65Ac	KY066690	F_0_06	[organism=Anastrepha fraterculus] PREDICTED: Anastrepha fraterculus larval cuticle protein 8, Complete CDS
CG6956 /Lcp65Ac	KY066691	F_0_07	[organism=Anastrepha fraterculus] PREDICTED: Anastrepha fraterculus larval cuticle protein 8, Complete CDS
CG6956 /Lcp65Ac	KY066692	F_0_08	[organism=Anastrepha fraterculus] PREDICTED: Anastrepha fraterculus larval cuticle protein 8, Complete CDS
CG6956 /Lcp65Ac	KY066693	F_0_09	[organism=Anastrepha fraterculus] PREDICTED: Anastrepha fraterculus larval cuticle protein 8, Complete CDS
CG6956 / Lcp65Ac	KY066610	O_0_01	[organism=Anastrepha obliqua] PREDICTED: Anastrepha obliqua larval cuticle protein 8, Complete CDS
CG6956 / Lcp65Ac	KY066611	O_0_02	[organism=Anastrepha obliqua] PREDICTED: Anastrepha obliqua larval cuticle protein 8, Complete CDS
CG6956 / Lcp65Ac	KY066612	O_0_03	[organism=Anastrepha obliqua] PREDICTED: Anastrepha obliqua larval cuticle protein 8, Complete CDS
CG6956 / Lcp65Ac	KY066613	O_0_04	[organism=Anastrepha obliqua] PREDICTED: Anastrepha obliqua larval cuticle protein 8, Complete CDS
CG6956 / Lcp65Ac	KY066614	O_0_05	[organism=Anastrepha obliqua] PREDICTED: Anastrepha obliqua larval cuticle protein 8, Complete CDS
CG6956 / Lcp65Ac	KY066615	O_0_06	[organism=Anastrepha obliqua] PREDICTED: Anastrepha obliqua larval cuticle protein 8, Complete CDS
CG6956 / Lcp65Ac	KY066616	O_0_07	[organism=Anastrepha obliqua] PREDICTED: Anastrepha obliqua larval cuticle protein 8, Complete CDS
CG6956 / Lcp65Ac	KY066617	O_0_08	[organism=Anastrepha obliqua] PREDICTED: Anastrepha obliqua larval cuticle protein 8, Complete CDS
CG6956 / Lcp65Ac	KY066618	O_0_09	[organism=Anastrepha obliqua] PREDICTED: Anastrepha obliqua larval cuticle protein 8, Complete CDS
CG6956 / Lcp65Ac	KY066619	O_0_10	[organism=Anastrepha obliqua] PREDICTED: Anastrepha obliqua larval cuticle protein 8, Complete CDS
CG6956 / Lcp65Ac	KY066620	S_0_01	[organism=Anastrepha sororcula] PREDICTED: Anastrepha sororcula larval cuticle protein 8, Complete CDS
CG6956 / Lcp65Ac	KY066621	S_0_02	[organism=Anastrepha sororcula] PREDICTED: Anastrepha sororcula larval cuticle protein 8, Complete CDS
CG6956 / Lcp65Ac	KY066622	S_0_04	[organism=Anastrepha sororcula] PREDICTED: Anastrepha sororcula larval cuticle protein 8, Complete CDS
CG6956 / Lcp65Ac	KY066623	S_0_05	[organism=Anastrepha sororcula] PREDICTED: Anastrepha sororcula larval cuticle protein 8, Complete CDS
CG6956 / Lcp65Ac	KY066624	S_0_06	[organism=Anastrepha sororcula] PREDICTED: Anastrepha sororcula larval cuticle protein 8, Complete CDS
CG6956 / Lcp65Ac	KY066625	S_0_07	[organism=Anastrepha sororcula] PREDICTED: Anastrepha sororcula larval cuticle protein 8, Complete CDS
CG6956 / Lcp65Ac	KY066626	S_0_08	[organism=Anastrepha sororcula] PREDICTED: Anastrepha sororcula larval cuticle protein 8, Complete CDS
CG6956 / Lcp65Ac	KY066627	S_0_09	[organism=Anastrepha sororcula] PREDICTED: Anastrepha sororcula larval cuticle protein 8, Complete CDS
CG6956 / Lcp65Ac	KY066628	S_0_10	[organism=Anastrepha sororcula] PREDICTED: Anastrepha sororcula larval cuticle protein 8, Complete CDS
CG7203	KY066629	F_0_01	[organism=Anastrepha fraterculus] PREDICTED: Anastrepha fraterculus adult cuticle protein 1, Partial CDS
CG7203	KY066630	F_0_02	[organism=Anastrepha fraterculus] PREDICTED: Anastrepha fraterculus adult cuticle protein 1, Partial CDS
CG7203	KY066631	F_0_03	[organism=Anastrepha fraterculus] PREDICTED: Anastrepha fraterculus adult cuticle protein 1, Partial CDS
CG7203	KY066632	F_0_04	[organism=Anastrepha fraterculus] PREDICTED: Anastrepha fraterculus adult cuticle protein 1, Partial CDS
CG7203	KY066633	F_0_05	[organism=Anastrepha fraterculus] PREDICTED: Anastrepha fraterculus adult cuticle protein 1, Partial CDS
CG7203	KY066634	F_0_06	[organism=Anastrepha fraterculus] PREDICTED: Anastrepha fraterculus adult cuticle protein 1, Partial CDS
CG7203	KY066635	F_0_07	[organism=Anastrepha fraterculus] PREDICTED: Anastrepha fraterculus adult cuticle protein 1, Partial CDS
CG7203	KY066636	F_0_08	[organism=Anastrepha fraterculus] PREDICTED: Anastrepha fraterculus adult cuticle protein 1, Partial CDS
CG7203	KY066637	F_0_09	[organism=Anastrepha fraterculus] PREDICTED: Anastrepha fraterculus adult cuticle protein 1, Partial CDS
CG7203	KY066638	O_0_01	[organism=Anastrepha obliqua] PREDICTED: Anastrepha obliqua adult cuticle protein 1, Partial CDS
CG7203	KY066639	O_0_02	[organism=Anastrepha obliqua] PREDICTED: Anastrepha obliqua adult cuticle protein 1, Partial CDS
CG7203	KY066640	O_0_03	[organism=Anastrepha obliqua] PREDICTED: Anastrepha obliqua adult cuticle protein 1, Partial CDS
CG7203	KY066641	O_0_04	[organism=Anastrepha obliqua] PREDICTED: Anastrepha obliqua adult cuticle protein 1, Partial CDS
CG7203	KY066642	O_0_05	[organism=Anastrepha obliqua] PREDICTED: Anastrepha obliqua adult cuticle protein 1, Partial CDS
CG7203	KY066643	O_0_06	[organism=Anastrepha obliqua] PREDICTED: Anastrepha obliqua adult cuticle protein 1, Partial CDS
CG7203	KY066644	O_0_07	[organism=Anastrepha obliqua] PREDICTED: Anastrepha obliqua adult cuticle protein 1, Partial CDS
CG7203	KY066645	O_0_08	[organism=Anastrepha obliqua] PREDICTED: Anastrepha obliqua adult cuticle protein 1, Partial CDS
CG7203	KY066646	O_0_09	[organism=Anastrepha obliqua] PREDICTED: Anastrepha obliqua adult cuticle protein 1, Partial CDS
CG7203	KY066647	O_0_10	[organism=Anastrepha obliqua] PREDICTED: Anastrepha obliqua adult cuticle protein 1, Partial CDS
CG7203	KY066648	S_0_01	[organism=Anastrepha sororcula] PREDICTED: Anastrepha sororcula adult cuticle protein 1, Partial CDS
CG7203	KY066649	S_0_02	[organism=Anastrepha sororcula] PREDICTED: Anastrepha sororcula adult cuticle protein 1, Partial CDS
CG7203	KY066650	S_0_04	[organism=Anastrepha sororcula] PREDICTED: Anastrepha sororcula adult cuticle protein 1, Partial CDS
CG7203	KY066651	S_0_05	[organism=Anastrepha sororcula] PREDICTED: Anastrepha sororcula adult cuticle protein 1, Partial CDS
CG7203	KY066652	S_0_06	[organism=Anastrepha sororcula] PREDICTED: Anastrepha sororcula adult cuticle protein 1, Partial CDS
CG7203	KY066653	S_0_07	[organism=Anastrepha sororcula] PREDICTED: Anastrepha sororcula adult cuticle protein 1, Partial CDS
CG7203	KY066654	S_0_08	[organism=Anastrepha sororcula] PREDICTED: Anastrepha sororcula adult cuticle protein 1, Partial CDS
CG7203	KY066655	S_0_09	[organism=Anastrepha sororcula] PREDICTED: Anastrepha sororcula adult cuticle protein 1, Partial CDS
CG7203	KY066656	S_0_10	[organism=Anastrepha sororcula] PREDICTED: Anastrepha sororcula adult cuticle protein 1, Partial CDS
CG8064	KY066657	F_0_01	[organism=Anastrepha fraterculus] PREDICTED: Anastrepha fraterculus WD repeat-containing protein 3, Partial CDS
CG8064	KY066658	F_0_02	[organism=Anastrepha fraterculus] PREDICTED: Anastrepha fraterculus WD repeat-containing protein 3, Partial CDS
CG8064	KY066659	F_0_03	[organism=Anastrepha fraterculus] PREDICTED: Anastrepha fraterculus WD repeat-containing protein 3, Partial CDS
CG8064	KY066660	F_0_04	[organism=Anastrepha fraterculus] PREDICTED: Anastrepha fraterculus WD repeat-containing protein 3, Partial CDS
CG8064	KY066661	F_0_05	[organism=Anastrepha fraterculus] PREDICTED: Anastrepha fraterculus WD repeat-containing protein 3, Partial CDS
CG8064	KY066662	F_0_06	[organism=Anastrepha fraterculus] PREDICTED: Anastrepha fraterculus WD repeat-containing protein 3, Partial CDS
CG8064	KY066663	F_0_07	[organism=Anastrepha fraterculus] PREDICTED: Anastrepha fraterculus WD repeat-containing protein 3, Partial CDS
CG8064	KY066664	F_0_08	[organism=Anastrepha fraterculus] PREDICTED: Anastrepha fraterculus WD repeat-containing protein 3, Partial CDS
CG8064	KY066665	F_0_09	[organism=Anastrepha fraterculus] PREDICTED: Anastrepha fraterculus WD repeat-containing protein 3, Partial CDS
CG8064	KY066666	O_0_01	[organism=Anastrepha obliqua] PREDICTED: Anastrepha obliqua WD repeat-containing protein 3, Partial CDS
CG8064	KY066667	O_0_02	[organism=Anastrepha obliqua] PREDICTED: Anastrepha obliqua WD repeat-containing protein 3, Partial CDS
CG8064	KY066668	O_0_03	[organism=Anastrepha obliqua] PREDICTED: Anastrepha obliqua WD repeat-containing protein 3, Partial CDS
CG8064	KY066669	O_0_04	[organism=Anastrepha obliqua] PREDICTED: Anastrepha obliqua WD repeat-containing protein 3, Partial CDS
CG8064	KY066670	O_0_05	[organism=Anastrepha obliqua] PREDICTED: Anastrepha obliqua WD repeat-containing protein 3, Partial CDS
CG8064	KY066671	O_0_06	[organism=Anastrepha obliqua] PREDICTED: Anastrepha obliqua WD repeat-containing protein 3, Partial CDS
CG8064	KY066672	O_0_07	[organism=Anastrepha obliqua] PREDICTED: Anastrepha obliqua WD repeat-containing protein 3, Partial CDS
CG8064	KY066673	O_0_08	[organism=Anastrepha obliqua] PREDICTED: Anastrepha obliqua WD repeat-containing protein 3, Partial CDS
CG8064	KY066674	O_0_09	[organism=Anastrepha obliqua] PREDICTED: Anastrepha obliqua WD repeat-containing protein 3, Partial CDS
CG8064	KY066675	O_0_10	[organism=Anastrepha obliqua] PREDICTED: Anastrepha obliqua WD repeat-containing protein 3, Partial CDS
CG8064	KY066676	S_0_01	[organism=Anastrepha sororcula] PREDICTED: Anastrepha sororcula WD repeat-containing protein 3, Partial CDS
CG8064	KY066677	S_0_02	[organism=Anastrepha sororcula] PREDICTED: Anastrepha sororcula WD repeat-containing protein 3, Partial CDS
CG8064	KY066678	S_0_04	[organism=Anastrepha sororcula] PREDICTED: Anastrepha sororcula WD repeat-containing protein 3, Partial CDS
CG8064	KY066679	S_0_05	[organism=Anastrepha sororcula] PREDICTED: Anastrepha sororcula WD repeat-containing protein 3, Partial CDS
CG8064	KY066680	S_0_06	[organism=Anastrepha sororcula] PREDICTED: Anastrepha sororcula WD repeat-containing protein 3, Partial CDS
CG8064	KY066681	S_0_07	[organism=Anastrepha sororcula] PREDICTED: Anastrepha sororcula WD repeat-containing protein 3, Partial CDS
CG8064	KY066682	S_0_08	[organism=Anastrepha sororcula] PREDICTED: Anastrepha sororcula WD repeat-containing protein 3, Partial CDS
CG8064	KY066683	S_0_09	[organism=Anastrepha sororcula] PREDICTED: Anastrepha sororcula WD repeat-containing protein 3, Partial CDS
CG8064	KY066684	S_0_10	[organism=Anastrepha sororcula] PREDICTED: Anastrepha sororcula WD repeat-containing protein 3, Partial CDS
CG9775	KY204779	F_0_01	[organism=Anastrepha fraterculus] PREDICTED: Anastrepha fraterculus serine/arginine-rich splicing factor 4, Partial CDS
CG9775	KY204780	F_0_02	[organism=Anastrepha fraterculus] PREDICTED: Anastrepha fraterculus serine/arginine-rich splicing factor 4, Partial CDS
CG9775	KY204781	F_0_03	[organism=Anastrepha fraterculus] PREDICTED: Anastrepha fraterculus serine/arginine-rich splicing factor 4, Partial CDS
CG9775	KY204782	F_0_04	[organism=Anastrepha fraterculus] PREDICTED: Anastrepha fraterculus serine/arginine-rich splicing factor 4, Partial CDS
CG9775	KY204783	F_0_05	[organism=Anastrepha fraterculus] PREDICTED: Anastrepha fraterculus serine/arginine-rich splicing factor 4, Partial CDS
CG9775	KY204784	F_0_06	[organism=Anastrepha fraterculus] PREDICTED: Anastrepha fraterculus serine/arginine-rich splicing factor 4, Partial CDS
CG9775	KY204785	F_0_07	[organism=Anastrepha fraterculus] PREDICTED: Anastrepha fraterculus serine/arginine-rich splicing factor 4, Partial CDS
CG9775	KY204786	F_0_08	[organism=Anastrepha fraterculus] PREDICTED: Anastrepha fraterculus serine/arginine-rich splicing factor 4, Partial CDS
CG9775	KY204787	F_0_09	[organism=Anastrepha fraterculus] PREDICTED: Anastrepha fraterculus serine/arginine-rich splicing factor 4, Partial CDS
CG9775	KY204788	O_0_01	[organism=Anastrepha obliqua] PREDICTED: Anastrepha obliqua serine/arginine-rich splicing factor 4, Partial CDS
CG9775	KY204789	O_0_02	[organism=Anastrepha obliqua] PREDICTED: Anastrepha obliqua serine/arginine-rich splicing factor 4, Partial CDS
CG9775	KY204790	O_0_03	[organism=Anastrepha obliqua] PREDICTED: Anastrepha obliqua serine/arginine-rich splicing factor 4, Partial CDS
CG9775	KY204791	O_0_04	[organism=Anastrepha obliqua] PREDICTED: Anastrepha obliqua serine/arginine-rich splicing factor 4, Partial CDS
CG9775	KY204792	O_0_05	[organism=Anastrepha obliqua] PREDICTED: Anastrepha obliqua serine/arginine-rich splicing factor 4, Partial CDS
CG9775	KY204793	O_0_06	[organism=Anastrepha obliqua] PREDICTED: Anastrepha obliqua serine/arginine-rich splicing factor 4, Partial CDS
CG9775	KY204794	O_0_07	[organism=Anastrepha obliqua] PREDICTED: Anastrepha obliqua serine/arginine-rich splicing factor 4, Partial CDS
CG9775	KY204795	O_0_08	[organism=Anastrepha obliqua] PREDICTED: Anastrepha obliqua serine/arginine-rich splicing factor 4, Partial CDS
CG9775	KY204796	O_0_09	[organism=Anastrepha obliqua] PREDICTED: Anastrepha obliqua serine/arginine-rich splicing factor 4, Partial CDS
CG9775	KY204797	O_0_10	[organism=Anastrepha obliqua] PREDICTED: Anastrepha obliqua serine/arginine-rich splicing factor 4, Partial CDS
CG9775	KY204798	S_0_01	[organism=Anastrepha sororcula] PREDICTED: Anastrepha sororcula serine/arginine-rich splicing factor 4, Partial CDS
CG9775	KY204799	S_0_02	[organism=Anastrepha sororcula] PREDICTED: Anastrepha sororcula serine/arginine-rich splicing factor 4, Partial CDS
CG9775	KY204800	S_0_04	[organism=Anastrepha sororcula] PREDICTED: Anastrepha sororcula serine/arginine-rich splicing factor 4, Partial CDS
CG9775	KY204801	S_0_05	[organism=Anastrepha sororcula] PREDICTED: Anastrepha sororcula serine/arginine-rich splicing factor 4, Partial CDS
CG9775	KY204802	S_0_06	[organism=Anastrepha sororcula] PREDICTED: Anastrepha sororcula serine/arginine-rich splicing factor 4, Partial CDS
CG9775	KY204803	S_0_07	[organism=Anastrepha sororcula] PREDICTED: Anastrepha sororcula serine/arginine-rich splicing factor 4, Partial CDS
CG9775	KY204804	S_0_08	[organism=Anastrepha sororcula] PREDICTED: Anastrepha sororcula serine/arginine-rich splicing factor 4, Partial CDS
CG9775	KY204805	S_0_09	[organism=Anastrepha sororcula] PREDICTED: Anastrepha sororcula serine/arginine-rich splicing factor 4, Partial CDS
CG9775	KY204806	S_0_10	[organism=Anastrepha sororcula] PREDICTED: Anastrepha sororcula serine/arginine-rich splicing factor 4, Partial CDS
CG14543	KY204807	F_0_01	[organism=Anastrepha fraterculus] PREDICTED: Anastrepha fraterculus pre-rRNA-processing protein TSR2 homolog, Partial CDS
CG14543	KY204808	F_0_02	[organism=Anastrepha fraterculus] PREDICTED: Anastrepha fraterculus pre-rRNA-processing protein TSR2 homolog, Partial CDS
CG14543	KY204809	F_0_03	[organism=Anastrepha fraterculus] PREDICTED: Anastrepha fraterculus pre-rRNA-processing protein TSR2 homolog, Partial CDS
CG14543	KY204810	F_0_04	[organism=Anastrepha fraterculus] PREDICTED: Anastrepha fraterculus pre-rRNA-processing protein TSR2 homolog, Partial CDS
CG14543	KY204811	F_0_05	[organism=Anastrepha fraterculus] PREDICTED: Anastrepha fraterculus pre-rRNA-processing protein TSR2 homolog, Partial CDS
CG14543	KY204812	F_0_06	[organism=Anastrepha fraterculus] PREDICTED: Anastrepha fraterculus pre-rRNA-processing protein TSR2 homolog, Partial CDS
CG14543	KY204813	F_0_07	[organism=Anastrepha fraterculus] PREDICTED: Anastrepha fraterculus pre-rRNA-processing protein TSR2 homolog, Partial CDS
CG14543	KY204814	F_0_08	[organism=Anastrepha fraterculus] PREDICTED: Anastrepha fraterculus pre-rRNA-processing protein TSR2 homolog, Partial CDS
CG14543	KY204815	F_0_09	[organism=Anastrepha fraterculus] PREDICTED: Anastrepha fraterculus pre-rRNA-processing protein TSR2 homolog, Partial CDS
CG14543	KY204816	O_0_01	[organism=Anastrepha obliqua] PREDICTED: Anastrepha obliqua pre-rRNA-processing protein TSR2 homolog, Partial CDS
CG14543	KY204817	O_0_02	[organism=Anastrepha obliqua] PREDICTED: Anastrepha obliqua pre-rRNA-processing protein TSR2 homolog, Partial CDS
CG14543	KY204818	O_0_03	[organism=Anastrepha obliqua] PREDICTED: Anastrepha obliqua pre-rRNA-processing protein TSR2 homolog, Partial CDS
CG14543	KY204819	O_0_04	[organism=Anastrepha obliqua] PREDICTED: Anastrepha obliqua pre-rRNA-processing protein TSR2 homolog, Partial CDS
CG14543	KY204820	O_0_05	[organism=Anastrepha obliqua] PREDICTED: Anastrepha obliqua pre-rRNA-processing protein TSR2 homolog, Partial CDS
CG14543	KY204821	O_0_06	[organism=Anastrepha obliqua] PREDICTED: Anastrepha obliqua pre-rRNA-processing protein TSR2 homolog, Partial CDS
CG14543	KY204822	O_0_07	[organism=Anastrepha obliqua] PREDICTED: Anastrepha obliqua pre-rRNA-processing protein TSR2 homolog, Partial CDS
CG14543	KY204823	O_0_08	[organism=Anastrepha obliqua] PREDICTED: Anastrepha obliqua pre-rRNA-processing protein TSR2 homolog, Partial CDS
CG14543	KY204824	O_0_09	[organism=Anastrepha obliqua] PREDICTED: Anastrepha obliqua pre-rRNA-processing protein TSR2 homolog, Partial CDS
CG14543	KY204825	O_0_10	[organism=Anastrepha obliqua] PREDICTED: Anastrepha obliqua pre-rRNA-processing protein TSR2 homolog, Partial CDS
CG14543	KY204826	S_0_01	[organism=Anastrepha sororcula] PREDICTED: Anastrepha sororcula pre-rRNA-processing protein TSR2 homolog, Partial CDS
CG14543	KY204827	S_0_02	[organism=Anastrepha sororcula] PREDICTED: Anastrepha sororcula pre-rRNA-processing protein TSR2 homolog, Partial CDS
CG14543	KY204828	S_0_04	[organism=Anastrepha sororcula] PREDICTED: Anastrepha sororcula pre-rRNA-processing protein TSR2 homolog, Partial CDS
CG14543	KY204829	S_0_05	[organism=Anastrepha sororcula] PREDICTED: Anastrepha sororcula pre-rRNA-processing protein TSR2 homolog, Partial CDS
CG14543	KY204830	S_0_06	[organism=Anastrepha sororcula] PREDICTED: Anastrepha sororcula pre-rRNA-processing protein TSR2 homolog, Partial CDS
CG14543	KY204831	S_0_07	[organism=Anastrepha sororcula] PREDICTED: Anastrepha sororcula pre-rRNA-processing protein TSR2 homolog, Partial CDS
CG14543	KY204832	S_0_08	[organism=Anastrepha sororcula] PREDICTED: Anastrepha sororcula pre-rRNA-processing protein TSR2 homolog, Partial CDS
CG14543	KY204833	S_0_09	[organism=Anastrepha sororcula] PREDICTED: Anastrepha sororcula pre-rRNA-processing protein TSR2 homolog, Partial CDS
CG14543	KY204834	S_0_10	[organism=Anastrepha sororcula] PREDICTED: Anastrepha sororcula pre-rRNA-processing protein TSR2 homolog, Partial CDS
Akap200	KY204835	F_0_01	[organism=Anastrepha fraterculus] PREDICTED: Anastrepha fraterculus myristoylated alanine-rich C-kinase substrate, Partial CDS
Akap200	KY204836	F_0_02	[organism=Anastrepha fraterculus] PREDICTED: Anastrepha fraterculus myristoylated alanine-rich C-kinase substrate, Partial CDS
Akap200	KY204837	F_0_03	[organism=Anastrepha fraterculus] PREDICTED: Anastrepha fraterculus myristoylated alanine-rich C-kinase substrate, Partial CDS
Akap200	KY204838	F_0_04	[organism=Anastrepha fraterculus] PREDICTED: Anastrepha fraterculus myristoylated alanine-rich C-kinase substrate, Partial CDS
Akap200	KY204839	F_0_05	[organism=Anastrepha fraterculus] PREDICTED: Anastrepha fraterculus myristoylated alanine-rich C-kinase substrate, Partial CDS
Akap200	KY204840	F_0_06	[organism=Anastrepha fraterculus] PREDICTED: Anastrepha fraterculus myristoylated alanine-rich C-kinase substrate, Partial CDS
Akap200	KY204841	F_0_07	[organism=Anastrepha fraterculus] PREDICTED: Anastrepha fraterculus myristoylated alanine-rich C-kinase substrate, Partial CDS
Akap200	KY204842	F_0_08	[organism=Anastrepha fraterculus] PREDICTED: Anastrepha fraterculus myristoylated alanine-rich C-kinase substrate, Partial CDS
Akap200	KY204843	F_0_09	[organism=Anastrepha fraterculus] PREDICTED: Anastrepha fraterculus myristoylated alanine-rich C-kinase substrate, Partial CDS
Akap200	KY204844	O_0_01	[organism=Anastrepha obliqua] PREDICTED: Anastrepha obliqua myristoylated alanine-rich C-kinase substrate, Partial CDS
Akap200	KY204845	O_0_02	[organism=Anastrepha obliqua] PREDICTED: Anastrepha obliqua myristoylated alanine-rich C-kinase substrate, Partial CDS
Akap200	KY204846	O_0_03	[organism=Anastrepha obliqua] PREDICTED: Anastrepha obliqua myristoylated alanine-rich C-kinase substrate, Partial CDS
Akap200	KY204847	O_0_04	[organism=Anastrepha obliqua] PREDICTED: Anastrepha obliqua myristoylated alanine-rich C-kinase substrate, Partial CDS
Akap200	KY204848	O_0_05	[organism=Anastrepha obliqua] PREDICTED: Anastrepha obliqua myristoylated alanine-rich C-kinase substrate, Partial CDS
Akap200	KY204849	O_0_06	[organism=Anastrepha obliqua] PREDICTED: Anastrepha obliqua myristoylated alanine-rich C-kinase substrate, Partial CDS
Akap200	KY204850	O_0_07	[organism=Anastrepha obliqua] PREDICTED: Anastrepha obliqua myristoylated alanine-rich C-kinase substrate, Partial CDS
Akap200	KY204851	O_0_08	[organism=Anastrepha obliqua] PREDICTED: Anastrepha obliqua myristoylated alanine-rich C-kinase substrate, Partial CDS
Akap200	KY204852	O_0_09	[organism=Anastrepha obliqua] PREDICTED: Anastrepha obliqua myristoylated alanine-rich C-kinase substrate, Partial CDS
Akap200	KY204853	O_0_10	[organism=Anastrepha obliqua] PREDICTED: Anastrepha obliqua myristoylated alanine-rich C-kinase substrate, Partial CDS
Akap200	KY204854	S_0_01	[organism=Anastrepha sororcula] PREDICTED: Anastrepha sororcula myristoylated alanine-rich C-kinase substrate, Partial CDS
Akap200	KY204855	S_0_02	[organism=Anastrepha sororcula] PREDICTED: Anastrepha sororcula myristoylated alanine-rich C-kinase substrate, Partial CDS
Akap200	KY204856	S_0_04	[organism=Anastrepha sororcula] PREDICTED: Anastrepha sororcula myristoylated alanine-rich C-kinase substrate, Partial CDS
Akap200	KY204857	S_0_05	[organism=Anastrepha sororcula] PREDICTED: Anastrepha sororcula myristoylated alanine-rich C-kinase substrate, Partial CDS
Akap200	KY204858	S_0_06	[organism=Anastrepha sororcula] PREDICTED: Anastrepha sororcula myristoylated alanine-rich C-kinase substrate, Partial CDS
Akap200	KY204859	S_0_07	[organism=Anastrepha sororcula] PREDICTED: Anastrepha sororcula myristoylated alanine-rich C-kinase substrate, Partial CDS
Akap200	KY204860	S_0_08	[organism=Anastrepha sororcula] PREDICTED: Anastrepha sororcula myristoylated alanine-rich C-kinase substrate, Partial CDS
Akap200	KY204861	S_0_09	[organism=Anastrepha sororcula] PREDICTED: Anastrepha sororcula myristoylated alanine-rich C-kinase substrate, Partial CDS
Akap200	KY204862	S_0_10	[organism=Anastrepha sororcula] PREDICTED: Anastrepha sororcula myristoylated alanine-rich C-kinase substrate, Partial CDS
Mlc-c	KY204863	F_0_01	[organism=Anastrepha fraterculus] PREDICTED: Anastrepha fraterculus myosin-2 essential light chain, transcript variant X2, Partial CDS
Mlc-c	KY204864	F_0_02	[organism=Anastrepha fraterculus] PREDICTED: Anastrepha fraterculus myosin-2 essential light chain, transcript variant X2, Partial CDS
Mlc-c	KY204865	F_0_03	[organism=Anastrepha fraterculus] PREDICTED: Anastrepha fraterculus myosin-2 essential light chain, transcript variant X2, Partial CDS
Mlc-c	KY204866	F_0_04	[organism=Anastrepha fraterculus] PREDICTED: Anastrepha fraterculus myosin-2 essential light chain, transcript variant X2, Partial CDS
Mlc-c	KY204867	F_0_05	[organism=Anastrepha fraterculus] PREDICTED: Anastrepha fraterculus myosin-2 essential light chain, transcript variant X2, Partial CDS
Mlc-c	KY204868	F_0_06	[organism=Anastrepha fraterculus] PREDICTED: Anastrepha fraterculus myosin-2 essential light chain, transcript variant X2, Partial CDS
Mlc-c	KY204869	F_0_07	[organism=Anastrepha fraterculus] PREDICTED: Anastrepha fraterculus myosin-2 essential light chain, transcript variant X2, Partial CDS
Mlc-c	KY204870	F_0_08	[organism=Anastrepha fraterculus] PREDICTED: Anastrepha fraterculus myosin-2 essential light chain, transcript variant X2, Partial CDS
Mlc-c	KY204871	F_0_09	[organism=Anastrepha fraterculus] PREDICTED: Anastrepha fraterculus myosin-2 essential light chain, transcript variant X2, Partial CDS
Mlc-c	KY204872	O_0_01	[organism=Anastrepha obliqua] PREDICTED: Anastrepha obliqua myosin-2 essential light chain, transcript variant X2, Partial CDS
Mlc-c	KY204873	O_0_02	[organism=Anastrepha obliqua] PREDICTED: Anastrepha obliqua myosin-2 essential light chain, transcript variant X2, Partial CDS
Mlc-c	KY204874	O_0_03	[organism=Anastrepha obliqua] PREDICTED: Anastrepha obliqua myosin-2 essential light chain, transcript variant X2, Partial CDS
Mlc-c	KY204875	O_0_04	[organism=Anastrepha obliqua] PREDICTED: Anastrepha obliqua myosin-2 essential light chain, transcript variant X2, Partial CDS
Mlc-c	KY204876	O_0_05	[organism=Anastrepha obliqua] PREDICTED: Anastrepha obliqua myosin-2 essential light chain, transcript variant X2, Partial CDS
Mlc-c	KY204877	O_0_06	[organism=Anastrepha obliqua] PREDICTED: Anastrepha obliqua myosin-2 essential light chain, transcript variant X2, Partial CDS
Mlc-c	KY204878	O_0_07	[organism=Anastrepha obliqua] PREDICTED: Anastrepha obliqua myosin-2 essential light chain, transcript variant X2, Partial CDS
Mlc-c	KY204879	O_0_08	[organism=Anastrepha obliqua] PREDICTED: Anastrepha obliqua myosin-2 essential light chain, transcript variant X2, Partial CDS
Mlc-c	KY204880	O_0_09	[organism=Anastrepha obliqua] PREDICTED: Anastrepha obliqua myosin-2 essential light chain, transcript variant X2, Partial CDS
Mlc-c	KY204881	O_0_10	[organism=Anastrepha obliqua] PREDICTED: Anastrepha obliqua myosin-2 essential light chain, transcript variant X2, Partial CDS
Mlc-c	KY204882	S_0_01	[organism=Anastrepha sororcula] PREDICTED: Anastrepha sororcula myosin-2 essential light chain, transcript variant X2, Partial CDS
Mlc-c	KY204883	S_0_02	[organism=Anastrepha sororcula] PREDICTED: Anastrepha sororcula myosin-2 essential light chain, transcript variant X2, Partial CDS
Mlc-c	KY204884	S_0_04	[organism=Anastrepha sororcula] PREDICTED: Anastrepha sororcula myosin-2 essential light chain, transcript variant X2, Partial CDS
Mlc-c	KY204885	S_0_05	[organism=Anastrepha sororcula] PREDICTED: Anastrepha sororcula myosin-2 essential light chain, transcript variant X2, Partial CDS
Mlc-c	KY204886	S_0_06	[organism=Anastrepha sororcula] PREDICTED: Anastrepha sororcula myosin-2 essential light chain, transcript variant X2, Partial CDS
Mlc-c	KY204887	S_0_07	[organism=Anastrepha sororcula] PREDICTED: Anastrepha sororcula myosin-2 essential light chain, transcript variant X2, Partial CDS
Mlc-c	KY204888	S_0_08	[organism=Anastrepha sororcula] PREDICTED: Anastrepha sororcula myosin-2 essential light chain, transcript variant X2, Partial CDS
Mlc-c	KY204889	S_0_09	[organism=Anastrepha sororcula] PREDICTED: Anastrepha sororcula myosin-2 essential light chain, transcript variant X2, Partial CDS
Mlc-c	KY204890	S_0_10	[organism=Anastrepha sororcula] PREDICTED: Anastrepha sororcula myosin-2 essential light chain, transcript variant X2, Partial CDS
Sptr	KY204891	F_0_01	[organism=Anastrepha fraterculus] PREDICTED: Anastrepha fraterculus sepiapterin reductase, Partial CDS
Sptr	KY204892	F_0_02	[organism=Anastrepha fraterculus] PREDICTED: Anastrepha fraterculus sepiapterin reductase, Partial CDS
Sptr	KY204893	F_0_03	[organism=Anastrepha fraterculus] PREDICTED: Anastrepha fraterculus sepiapterin reductase, Partial CDS
Sptr	KY204894	F_0_04	[organism=Anastrepha fraterculus] PREDICTED: Anastrepha fraterculus sepiapterin reductase, Partial CDS
Sptr	KY204895	F_0_05	[organism=Anastrepha fraterculus] PREDICTED: Anastrepha fraterculus sepiapterin reductase, Partial CDS
Sptr	KY204896	F_0_06	[organism=Anastrepha fraterculus] PREDICTED: Anastrepha fraterculus sepiapterin reductase, Partial CDS
Sptr	KY204897	F_0_07	[organism=Anastrepha fraterculus] PREDICTED: Anastrepha fraterculus sepiapterin reductase, Partial CDS
Sptr	KY204898	F_0_08	[organism=Anastrepha fraterculus] PREDICTED: Anastrepha fraterculus sepiapterin reductase, Partial CDS
Sptr	KY204899	F_0_09	[organism=Anastrepha fraterculus] PREDICTED: Anastrepha fraterculus sepiapterin reductase, Partial CDS
Sptr	KY204900	O_0_01	[organism=Anastrepha obliqua] PREDICTED: Anastrepha obliqua sepiapterin reductase, Partial CDS
Sptr	KY204901	O_0_02	[organism=Anastrepha obliqua] PREDICTED: Anastrepha obliqua sepiapterin reductase, Partial CDS
Sptr	KY204902	O_0_03	[organism=Anastrepha obliqua] PREDICTED: Anastrepha obliqua sepiapterin reductase, Partial CDS
Sptr	KY204903	O_0_04	[organism=Anastrepha obliqua] PREDICTED: Anastrepha obliqua sepiapterin reductase, Partial CDS
Sptr	KY204904	O_0_05	[organism=Anastrepha obliqua] PREDICTED: Anastrepha obliqua sepiapterin reductase, Partial CDS
Sptr	KY204905	O_0_06	[organism=Anastrepha obliqua] PREDICTED: Anastrepha obliqua sepiapterin reductase, Partial CDS
Sptr	KY204906	O_0_07	[organism=Anastrepha obliqua] PREDICTED: Anastrepha obliqua sepiapterin reductase, Partial CDS
Sptr	KY204907	O_0_08	[organism=Anastrepha obliqua] PREDICTED: Anastrepha obliqua sepiapterin reductase, Partial CDS
Sptr	KY204908	O_0_09	[organism=Anastrepha obliqua] PREDICTED: Anastrepha obliqua sepiapterin reductase, Partial CDS
Sptr	KY204909	O_0_10	[organism=Anastrepha obliqua] PREDICTED: Anastrepha obliqua sepiapterin reductase, Partial CDS
Sptr	KY204910	S_0_01	[organism=Anastrepha sororcula] PREDICTED: Anastrepha sororcula sepiapterin reductase, Partial CDS
Sptr	KY204911	S_0_02	[organism=Anastrepha sororcula] PREDICTED: Anastrepha sororcula sepiapterin reductase, Partial CDS
Sptr	KY204912	S_0_04	[organism=Anastrepha sororcula] PREDICTED: Anastrepha sororcula sepiapterin reductase, Partial CDS
Sptr	KY204913	S_0_05	[organism=Anastrepha sororcula] PREDICTED: Anastrepha sororcula sepiapterin reductase, Partial CDS
Sptr	KY204914	S_0_06	[organism=Anastrepha sororcula] PREDICTED: Anastrepha sororcula sepiapterin reductase, Partial CDS
Sptr	KY204915	S_0_07	[organism=Anastrepha sororcula] PREDICTED: Anastrepha sororcula sepiapterin reductase, Partial CDS
Sptr	KY204916	S_0_08	[organism=Anastrepha sororcula] PREDICTED: Anastrepha sororcula sepiapterin reductase, Partial CDS
Sptr	KY204917	S_0_09	[organism=Anastrepha sororcula] PREDICTED: Anastrepha sororcula sepiapterin reductase, Partial CDS
Sptr	KY204918	S_0_10	[organism=Anastrepha sororcula] PREDICTED: Anastrepha sororcula sepiapterin reductase, Partial CDS
Tctp	KY204919	F_0_01	[organism=Anastrepha fraterculus] PREDICTED: Anastrepha fraterculus translationally-controlled tumor protein homolog, Partial CDS
Tctp	KY204920	F_0_02	[organism=Anastrepha fraterculus] PREDICTED: Anastrepha fraterculus translationally-controlled tumor protein homolog, Partial CDS
Tctp	KY204921	F_0_03	[organism=Anastrepha fraterculus] PREDICTED: Anastrepha fraterculus translationally-controlled tumor protein homolog, Partial CDS
Tctp	KY204922	F_0_04	[organism=Anastrepha fraterculus] PREDICTED: Anastrepha fraterculus translationally-controlled tumor protein homolog, Partial CDS
Tctp	KY204923	F_0_05	[organism=Anastrepha fraterculus] PREDICTED: Anastrepha fraterculus translationally-controlled tumor protein homolog, Partial CDS
Tctp	KY204924	F_0_06	[organism=Anastrepha fraterculus] PREDICTED: Anastrepha fraterculus translationally-controlled tumor protein homolog, Partial CDS
Tctp	KY204925	F_0_07	[organism=Anastrepha fraterculus] PREDICTED: Anastrepha fraterculus translationally-controlled tumor protein homolog, Partial CDS
Tctp	KY204926	F_0_08	[organism=Anastrepha fraterculus] PREDICTED: Anastrepha fraterculus translationally-controlled tumor protein homolog, Partial CDS
Tctp	KY204927	F_0_09	[organism=Anastrepha fraterculus] PREDICTED: Anastrepha fraterculus translationally-controlled tumor protein homolog, Partial CDS
Tctp	KY204928	O_0_01	[organism=Anastrepha obliqua] PREDICTED: Anastrepha obliqua translationally-controlled tumor protein homolog, Partial CDS
Tctp	KY204929	O_0_02	[organism=Anastrepha obliqua] PREDICTED: Anastrepha obliqua translationally-controlled tumor protein homolog, Partial CDS
Tctp	KY204930	O_0_03	[organism=Anastrepha obliqua] PREDICTED: Anastrepha obliqua translationally-controlled tumor protein homolog, Partial CDS
Tctp	KY204931	O_0_04	[organism=Anastrepha obliqua] PREDICTED: Anastrepha obliqua translationally-controlled tumor protein homolog, Partial CDS
Tctp	KY204932	O_0_05	[organism=Anastrepha obliqua] PREDICTED: Anastrepha obliqua translationally-controlled tumor protein homolog, Partial CDS
Tctp	KY204933	O_0_06	[organism=Anastrepha obliqua] PREDICTED: Anastrepha obliqua translationally-controlled tumor protein homolog, Partial CDS
Tctp	KY204934	O_0_07	[organism=Anastrepha obliqua] PREDICTED: Anastrepha obliqua translationally-controlled tumor protein homolog, Partial CDS
Tctp	KY204935	O_0_08	[organism=Anastrepha obliqua] PREDICTED: Anastrepha obliqua translationally-controlled tumor protein homolog, Partial CDS
Tctp	KY204936	O_0_09	[organism=Anastrepha obliqua] PREDICTED: Anastrepha obliqua translationally-controlled tumor protein homolog, Partial CDS
Tctp	KY204937	O_0_10	[organism=Anastrepha obliqua] PREDICTED: Anastrepha obliqua translationally-controlled tumor protein homolog, Partial CDS
Tctp	KY204938	S_0_01	[organism=Anastrepha sororcula] PREDICTED: Anastrepha sororcula translationally-controlled tumor protein homolog, Partial CDS
Tctp	KY204939	S_0_02	[organism=Anastrepha sororcula] PREDICTED: Anastrepha sororcula translationally-controlled tumor protein homolog, Partial CDS
Tctp	KY204940	S_0_04	[organism=Anastrepha sororcula] PREDICTED: Anastrepha sororcula translationally-controlled tumor protein homolog, Partial CDS
Tctp	KY204941	S_0_05	[organism=Anastrepha sororcula] PREDICTED: Anastrepha sororcula translationally-controlled tumor protein homolog, Partial CDS
Tctp	KY204942	S_0_06	[organism=Anastrepha sororcula] PREDICTED: Anastrepha sororcula translationally-controlled tumor protein homolog, Partial CDS
Tctp	KY204943	S_0_07	[organism=Anastrepha sororcula] PREDICTED: Anastrepha sororcula translationally-controlled tumor protein homolog, Partial CDS
Tctp	KY204944	S_0_08	[organism=Anastrepha sororcula] PREDICTED: Anastrepha sororcula translationally-controlled tumor protein homolog, Partial CDS
Tctp	KY204945	S_0_09	[organism=Anastrepha sororcula] PREDICTED: Anastrepha sororcula translationally-controlled tumor protein homolog, Partial CDS
Tctp	KY204946	S_0_10	[organism=Anastrepha sororcula] PREDICTED: Anastrepha sororcula translationally-controlled tumor protein homolog, Partial CDS
tra2	KY204947	F_0_01	[organism=Anastrepha fraterculus] PREDICTED: Anastrepha fraterculus transformer-2, Partial CDS
tra2	KY204948	F_0_02	[organism=Anastrepha fraterculus] PREDICTED: Anastrepha fraterculus transformer-2, Partial CDS
tra2	KY204949	F_0_03	[organism=Anastrepha fraterculus] PREDICTED: Anastrepha fraterculus transformer-2, Partial CDS
tra2	KY204950	F_0_04	[organism=Anastrepha fraterculus] PREDICTED: Anastrepha fraterculus transformer-2, Partial CDS
tra2	KY204951	F_0_05	[organism=Anastrepha fraterculus] PREDICTED: Anastrepha fraterculus transformer-2, Partial CDS
tra2	KY204952	F_0_06	[organism=Anastrepha fraterculus] PREDICTED: Anastrepha fraterculus transformer-2, Partial CDS
tra2	KY204953	F_0_07	[organism=Anastrepha fraterculus] PREDICTED: Anastrepha fraterculus transformer-2, Partial CDS
tra2	KY204954	F_0_08	[organism=Anastrepha fraterculus] PREDICTED: Anastrepha fraterculus transformer-2, Partial CDS
tra2	KY204955	F_0_09	[organism=Anastrepha fraterculus] PREDICTED: Anastrepha fraterculus transformer-2, Partial CDS
tra2	KY204956	O_0_01	[organism=Anastrepha obliqua] PREDICTED: Anastrepha obliqua transformer-2, Partial CDS
tra2	KY204957	O_0_02	[organism=Anastrepha obliqua] PREDICTED: Anastrepha obliqua transformer-2, Partial CDS
tra2	KY204958	O_0_03	[organism=Anastrepha obliqua] PREDICTED: Anastrepha obliqua transformer-2, Partial CDS
tra2	KY204959	O_0_04	[organism=Anastrepha obliqua] PREDICTED: Anastrepha obliqua transformer-2, Partial CDS
tra2	KY204960	O_0_05	[organism=Anastrepha obliqua] PREDICTED: Anastrepha obliqua transformer-2, Partial CDS
tra2	KY204961	O_0_06	[organism=Anastrepha obliqua] PREDICTED: Anastrepha obliqua transformer-2, Partial CDS
tra2	KY204962	O_0_07	[organism=Anastrepha obliqua] PREDICTED: Anastrepha obliqua transformer-2, Partial CDS
tra2	KY204963	O_0_08	[organism=Anastrepha obliqua] PREDICTED: Anastrepha obliqua transformer-2, Partial CDS
tra2	KY204964	O_0_09	[organism=Anastrepha obliqua] PREDICTED: Anastrepha obliqua transformer-2, Partial CDS
tra2	KY204965	O_0_10	[organism=Anastrepha obliqua] PREDICTED: Anastrepha obliqua transformer-2, Partial CDS
tra2	KY204966	S_0_01	[organism=Anastrepha sororcula] PREDICTED: Anastrepha sororcula transformer-2, Partial CDS
tra2	KY204967	S_0_02	[organism=Anastrepha sororcula] PREDICTED: Anastrepha sororcula transformer-2, Partial CDS
tra2	KY204968	S_0_04	[organism=Anastrepha sororcula] PREDICTED: Anastrepha sororcula transformer-2, Partial CDS
tra2	KY204969	S_0_05	[organism=Anastrepha sororcula] PREDICTED: Anastrepha sororcula transformer-2, Partial CDS
tra2	KY204970	S_0_06	[organism=Anastrepha sororcula] PREDICTED: Anastrepha sororcula transformer-2, Partial CDS
tra2	KY204971	S_0_07	[organism=Anastrepha sororcula] PREDICTED: Anastrepha sororcula transformer-2, Partial CDS
tra2	KY204972	S_0_08	[organism=Anastrepha sororcula] PREDICTED: Anastrepha sororcula transformer-2, Partial CDS
tra2	KY204973	S_0_09	[organism=Anastrepha sororcula] PREDICTED: Anastrepha sororcula transformer-2, Partial CDS
tra2	KY204974	S_0_10	[organism=Anastrepha sororcula] PREDICTED: Anastrepha sororcula transformer-2, Partial CDS
TpnC73F	KY204975	F_0_01	[organism=Anastrepha fraterculus] PREDICTED: Anastrepha fraterculus troponin C, isoform 3, Partial CDS
TpnC73F	KY204976	F_0_02	[organism=Anastrepha fraterculus] PREDICTED: Anastrepha fraterculus troponin C, isoform 3, Partial CDS
TpnC73F	KY204977	F_0_03	[organism=Anastrepha fraterculus] PREDICTED: Anastrepha fraterculus troponin C, isoform 3, Partial CDS
TpnC73F	KY204978	F_0_04	[organism=Anastrepha fraterculus] PREDICTED: Anastrepha fraterculus troponin C, isoform 3, Partial CDS
TpnC73F	KY204979	F_0_05	[organism=Anastrepha fraterculus] PREDICTED: Anastrepha fraterculus troponin C, isoform 3, Partial CDS
TpnC73F	KY204980	F_0_06	[organism=Anastrepha fraterculus] PREDICTED: Anastrepha fraterculus troponin C, isoform 3, Partial CDS
TpnC73F	KY204981	F_0_07	[organism=Anastrepha fraterculus] PREDICTED: Anastrepha fraterculus troponin C, isoform 3, Partial CDS
TpnC73F	KY204982	F_0_08	[organism=Anastrepha fraterculus] PREDICTED: Anastrepha fraterculus troponin C, isoform 3, Partial CDS
TpnC73F	KY204983	F_0_09	[organism=Anastrepha fraterculus] PREDICTED: Anastrepha fraterculus troponin C, isoform 3, Partial CDS
TpnC73F	KY204984	O_0_01	[organism=Anastrepha obliqua] PREDICTED: Anastrepha obliqua troponin C, isoform 3, Partial CDS
TpnC73F	KY204985	O_0_02	[organism=Anastrepha obliqua] PREDICTED: Anastrepha obliqua troponin C, isoform 3, Partial CDS
TpnC73F	KY204986	O_0_03	[organism=Anastrepha obliqua] PREDICTED: Anastrepha obliqua troponin C, isoform 3, Partial CDS
TpnC73F	KY204987	O_0_04	[organism=Anastrepha obliqua] PREDICTED: Anastrepha obliqua troponin C, isoform 3, Partial CDS
TpnC73F	KY204988	O_0_05	[organism=Anastrepha obliqua] PREDICTED: Anastrepha obliqua troponin C, isoform 3, Partial CDS
TpnC73F	KY204989	O_0_06	[organism=Anastrepha obliqua] PREDICTED: Anastrepha obliqua troponin C, isoform 3, Partial CDS
TpnC73F	KY204990	O_0_07	[organism=Anastrepha obliqua] PREDICTED: Anastrepha obliqua troponin C, isoform 3, Partial CDS
TpnC73F	KY204991	O_0_08	[organism=Anastrepha obliqua] PREDICTED: Anastrepha obliqua troponin C, isoform 3, Partial CDS
TpnC73F	KY204992	O_0_09	[organism=Anastrepha obliqua] PREDICTED: Anastrepha obliqua troponin C, isoform 3, Partial CDS
TpnC73F	KY204993	O_0_10	[organism=Anastrepha obliqua] PREDICTED: Anastrepha obliqua troponin C, isoform 3, Partial CDS
TpnC73F	KY204994	S_0_01	[organism=Anastrepha sororcula] PREDICTED: Anastrepha sororcula troponin C, isoform 3, Partial CDS
TpnC73F	KY204995	S_0_02	[organism=Anastrepha sororcula] PREDICTED: Anastrepha sororcula troponin C, isoform 3, Partial CDS
TpnC73F	KY204996	S_0_04	[organism=Anastrepha sororcula] PREDICTED: Anastrepha sororcula troponin C, isoform 3, Partial CDS
TpnC73F	KY204997	S_0_05	[organism=Anastrepha sororcula] PREDICTED: Anastrepha sororcula troponin C, isoform 3, Partial CDS
TpnC73F	KY204998	S_0_06	[organism=Anastrepha sororcula] PREDICTED: Anastrepha sororcula troponin C, isoform 3, Partial CDS
TpnC73F	KY204999	S_0_07	[organism=Anastrepha sororcula] PREDICTED: Anastrepha sororcula troponin C, isoform 3, Partial CDS
TpnC73F	KY205000	S_0_08	[organism=Anastrepha sororcula] PREDICTED: Anastrepha sororcula troponin C, isoform 3, Partial CDS
TpnC73F	KY205001	S_0_09	[organism=Anastrepha sororcula] PREDICTED: Anastrepha sororcula troponin C, isoform 3, Partial CDS
TpnC73F	KY205002	S_0_10	[organism=Anastrepha sororcula] PREDICTED: Anastrepha sororcula troponin C, isoform 3, Partial CDS
CG10031	KY205003	F_0_01	[organism=Anastrepha fraterculus] PREDICTED: Anastrepha fraterculus protease inhibitor-like, Complete CDS
CG10031	KY205004	F_0_02	[organism=Anastrepha fraterculus] PREDICTED: Anastrepha fraterculus protease inhibitor-like, Complete CDS
CG10031	KY205005	F_0_03	[organism=Anastrepha fraterculus] PREDICTED: Anastrepha fraterculus protease inhibitor-like, Complete CDS
CG10031	KY205006	F_0_04	[organism=Anastrepha fraterculus] PREDICTED: Anastrepha fraterculus protease inhibitor-like, Complete CDS
CG10031	KY205007	F_0_05	[organism=Anastrepha fraterculus] PREDICTED: Anastrepha fraterculus protease inhibitor-like, Complete CDS
CG10031	KY205008	F_0_06	[organism=Anastrepha fraterculus] PREDICTED: Anastrepha fraterculus protease inhibitor-like, Complete CDS
CG10031	KY205009	F_0_07	[organism=Anastrepha fraterculus] PREDICTED: Anastrepha fraterculus protease inhibitor-like, Complete CDS
CG10031	KY205010	F_0_08	[organism=Anastrepha fraterculus] PREDICTED: Anastrepha fraterculus protease inhibitor-like, Complete CDS
CG10031	KY205011	F_0_09	[organism=Anastrepha fraterculus] PREDICTED: Anastrepha fraterculus protease inhibitor-like, Complete CDS
CG10031	KY205012	O_0_01	[organism=Anastrepha obliqua] PREDICTED: Anastrepha obliqua protease inhibitor-like, Complete CDS
CG10031	KY205013	O_0_02	[organism=Anastrepha obliqua] PREDICTED: Anastrepha obliqua protease inhibitor-like, Complete CDS
CG10031	KY205014	O_0_03	[organism=Anastrepha obliqua] PREDICTED: Anastrepha obliqua protease inhibitor-like, Complete CDS
CG10031	KY205015	O_0_04	[organism=Anastrepha obliqua] PREDICTED: Anastrepha obliqua protease inhibitor-like, Complete CDS
CG10031	KY205016	O_0_05	[organism=Anastrepha obliqua] PREDICTED: Anastrepha obliqua protease inhibitor-like, Complete CDS
CG10031	KY205017	O_0_06	[organism=Anastrepha obliqua] PREDICTED: Anastrepha obliqua protease inhibitor-like, Complete CDS
CG10031	KY205018	O_0_07	[organism=Anastrepha obliqua] PREDICTED: Anastrepha obliqua protease inhibitor-like, Complete CDS
CG10031	KY205019	O_0_08	[organism=Anastrepha obliqua] PREDICTED: Anastrepha obliqua protease inhibitor-like, Complete CDS
CG10031	KY205020	O_0_09	[organism=Anastrepha obliqua] PREDICTED: Anastrepha obliqua protease inhibitor-like, Complete CDS
CG10031	KY205021	O_0_10	[organism=Anastrepha obliqua] PREDICTED: Anastrepha obliqua protease inhibitor-like, Complete CDS
CG10031	KY205022	S_0_01	[organism=Anastrepha sororcula] PREDICTED: Anastrepha sororcula protease inhibitor-like, Complete CDS
CG10031	KY205023	S_0_02	[organism=Anastrepha sororcula] PREDICTED: Anastrepha sororcula protease inhibitor-like, Complete CDS
CG10031	KY205024	S_0_04	[organism=Anastrepha sororcula] PREDICTED: Anastrepha sororcula protease inhibitor-like, Complete CDS
CG10031	KY205025	S_0_05	[organism=Anastrepha sororcula] PREDICTED: Anastrepha sororcula protease inhibitor-like, Complete CDS
CG10031	KY205026	S_0_06	[organism=Anastrepha sororcula] PREDICTED: Anastrepha sororcula protease inhibitor-like, Complete CDS
CG10031	KY205027	S_0_07	[organism=Anastrepha sororcula] PREDICTED: Anastrepha sororcula protease inhibitor-like, Complete CDS
CG10031	KY205028	S_0_08	[organism=Anastrepha sororcula] PREDICTED: Anastrepha sororcula protease inhibitor-like, Complete CDS
CG10031	KY205029	S_0_09	[organism=Anastrepha sororcula] PREDICTED: Anastrepha sororcula protease inhibitor-like, Complete CDS
CG10031	KY205030	S_0_10	[organism=Anastrepha sororcula] PREDICTED: Anastrepha sororcula protease inhibitor-like, Complete CDS
CG16713	KY205031	F_0_01	[organism=Anastrepha fraterculus] PREDICTED: Anastrepha fraterculus male accessory gland serine protease inhibitor-like, Complete CDS
CG16713	KY205032	F_0_02	[organism=Anastrepha fraterculus] PREDICTED: Anastrepha fraterculus male accessory gland serine protease inhibitor-like, Complete CDS
CG16713	KY205033	F_0_03	[organism=Anastrepha fraterculus] PREDICTED: Anastrepha fraterculus male accessory gland serine protease inhibitor-like, Complete CDS
CG16713	KY205034	F_0_04	[organism=Anastrepha fraterculus] PREDICTED: Anastrepha fraterculus male accessory gland serine protease inhibitor-like, Complete CDS
CG16713	KY205035	F_0_05	[organism=Anastrepha fraterculus] PREDICTED: Anastrepha fraterculus male accessory gland serine protease inhibitor-like, Complete CDS
CG16713	KY205036	F_0_06	[organism=Anastrepha fraterculus] PREDICTED: Anastrepha fraterculus male accessory gland serine protease inhibitor-like, Complete CDS
CG16713	KY205037	F_0_07	[organism=Anastrepha fraterculus] PREDICTED: Anastrepha fraterculus male accessory gland serine protease inhibitor-like, Complete CDS
CG16713	KY205038	F_0_08	[organism=Anastrepha fraterculus] PREDICTED: Anastrepha fraterculus male accessory gland serine protease inhibitor-like, Complete CDS
CG16713	KY205039	F_0_09	[organism=Anastrepha fraterculus] PREDICTED: Anastrepha fraterculus male accessory gland serine protease inhibitor-like, Complete CDS
CG16713	KY205040	O_0_01	[organism=Anastrepha obliqua] PREDICTED: Anastrepha obliqua male accessory gland serine protease inhibitor-like, Complete CDS
CG16713	KY205041	O_0_02	[organism=Anastrepha obliqua] PREDICTED: Anastrepha obliqua male accessory gland serine protease inhibitor-like, Complete CDS
CG16713	KY205042	O_0_03	[organism=Anastrepha obliqua] PREDICTED: Anastrepha obliqua male accessory gland serine protease inhibitor-like, Complete CDS
CG16713	KY205043	O_0_04	[organism=Anastrepha obliqua] PREDICTED: Anastrepha obliqua male accessory gland serine protease inhibitor-like, Complete CDS
CG16713	KY205044	O_0_05	[organism=Anastrepha obliqua] PREDICTED: Anastrepha obliqua male accessory gland serine protease inhibitor-like, Complete CDS
CG16713	KY205045	O_0_06	[organism=Anastrepha obliqua] PREDICTED: Anastrepha obliqua male accessory gland serine protease inhibitor-like, Complete CDS
CG16713	KY205046	O_0_07	[organism=Anastrepha obliqua] PREDICTED: Anastrepha obliqua male accessory gland serine protease inhibitor-like, Complete CDS
CG16713	KY205047	O_0_08	[organism=Anastrepha obliqua] PREDICTED: Anastrepha obliqua male accessory gland serine protease inhibitor-like, Complete CDS
CG16713	KY205048	O_0_09	[organism=Anastrepha obliqua] PREDICTED: Anastrepha obliqua male accessory gland serine protease inhibitor-like, Complete CDS
CG16713	KY205049	O_0_10	[organism=Anastrepha obliqua] PREDICTED: Anastrepha obliqua male accessory gland serine protease inhibitor-like, Complete CDS
CG16713	KY205050	S_0_01	[organism=Anastrepha sororcula] PREDICTED: Anastrepha sororcula male accessory gland serine protease inhibitor-like, Complete CDS
CG16713	KY205051	S_0_02	[organism=Anastrepha sororcula] PREDICTED: Anastrepha sororcula male accessory gland serine protease inhibitor-like, Complete CDS
CG16713	KY205052	S_0_04	[organism=Anastrepha sororcula] PREDICTED: Anastrepha sororcula male accessory gland serine protease inhibitor-like, Complete CDS
CG16713	KY205053	S_0_05	[organism=Anastrepha sororcula] PREDICTED: Anastrepha sororcula male accessory gland serine protease inhibitor-like, Complete CDS
CG16713	KY205054	S_0_06	[organism=Anastrepha sororcula] PREDICTED: Anastrepha sororcula male accessory gland serine protease inhibitor-like, Complete CDS
CG16713	KY205055	S_0_07	[organism=Anastrepha sororcula] PREDICTED: Anastrepha sororcula male accessory gland serine protease inhibitor-like, Complete CDS
CG16713	KY205056	S_0_08	[organism=Anastrepha sororcula] PREDICTED: Anastrepha sororcula male accessory gland serine protease inhibitor-like, Complete CDS
CG16713	KY205057	S_0_09	[organism=Anastrepha sororcula] PREDICTED: Anastrepha sororcula male accessory gland serine protease inhibitor-like, Complete CDS
CG16713	KY205058	S_0_10	[organism=Anastrepha sororcula] PREDICTED: Anastrepha sororcula male accessory gland serine protease inhibitor-like, Complete CDS
RpL27A	KY205059	F_0_01	[organism=Anastrepha fraterculus] PREDICTED: Anastrepha fraterculus 60S ribosomal protein L27a, Partial CDS
RpL27A	KY205060	F_0_02	[organism=Anastrepha fraterculus] PREDICTED: Anastrepha fraterculus 60S ribosomal protein L27a, Partial CDS
RpL27A	KY205061	F_0_03	[organism=Anastrepha fraterculus] PREDICTED: Anastrepha fraterculus 60S ribosomal protein L27a, Partial CDS
RpL27A	KY205062	F_0_04	[organism=Anastrepha fraterculus] PREDICTED: Anastrepha fraterculus 60S ribosomal protein L27a, Partial CDS
RpL27A	KY205063	F_0_05	[organism=Anastrepha fraterculus] PREDICTED: Anastrepha fraterculus 60S ribosomal protein L27a, Partial CDS
RpL27A	KY205064	F_0_06	[organism=Anastrepha fraterculus] PREDICTED: Anastrepha fraterculus 60S ribosomal protein L27a, Partial CDS
RpL27A	KY205065	F_0_07	[organism=Anastrepha fraterculus] PREDICTED: Anastrepha fraterculus 60S ribosomal protein L27a, Partial CDS
RpL27A	KY205066	F_0_08	[organism=Anastrepha fraterculus] PREDICTED: Anastrepha fraterculus 60S ribosomal protein L27a, Partial CDS
RpL27A	KY205067	F_0_09	[organism=Anastrepha fraterculus] PREDICTED: Anastrepha fraterculus 60S ribosomal protein L27a, Partial CDS
RpL27A	KY205068	O_0_01	[organism=Anastrepha obliqua] PREDICTED: Anastrepha obliqua 60S ribosomal protein L27a, Partial CDS
RpL27A	KY205069	O_0_02	[organism=Anastrepha obliqua] PREDICTED: Anastrepha obliqua 60S ribosomal protein L27a, Partial CDS
RpL27A	KY205070	O_0_03	[organism=Anastrepha obliqua] PREDICTED: Anastrepha obliqua 60S ribosomal protein L27a, Partial CDS
RpL27A	KY205071	O_0_04	[organism=Anastrepha obliqua] PREDICTED: Anastrepha obliqua 60S ribosomal protein L27a, Partial CDS
RpL27A	KY205072	O_0_05	[organism=Anastrepha obliqua] PREDICTED: Anastrepha obliqua 60S ribosomal protein L27a, Partial CDS
RpL27A	KY205073	O_0_06	[organism=Anastrepha obliqua] PREDICTED: Anastrepha obliqua 60S ribosomal protein L27a, Partial CDS
RpL27A	KY205074	O_0_07	[organism=Anastrepha obliqua] PREDICTED: Anastrepha obliqua 60S ribosomal protein L27a, Partial CDS
RpL27A	KY205075	O_0_08	[organism=Anastrepha obliqua] PREDICTED: Anastrepha obliqua 60S ribosomal protein L27a, Partial CDS
RpL27A	KY205076	O_0_09	[organism=Anastrepha obliqua] PREDICTED: Anastrepha obliqua 60S ribosomal protein L27a, Partial CDS
RpL27A	KY205077	O_0_10	[organism=Anastrepha obliqua] PREDICTED: Anastrepha obliqua 60S ribosomal protein L27a, Partial CDS
RpL27A	KY205078	S_0_01	[organism=Anastrepha sororcula] PREDICTED: Anastrepha sororcula 60S ribosomal protein L27a, Partial CDS
RpL27A	KY205079	S_0_02	[organism=Anastrepha sororcula] PREDICTED: Anastrepha sororcula 60S ribosomal protein L27a, Partial CDS
RpL27A	KY205080	S_0_04	[organism=Anastrepha sororcula] PREDICTED: Anastrepha sororcula 60S ribosomal protein L27a, Partial CDS
RpL27A	KY205081	S_0_05	[organism=Anastrepha sororcula] PREDICTED: Anastrepha sororcula 60S ribosomal protein L27a, Partial CDS
RpL27A	KY205082	S_0_06	[organism=Anastrepha sororcula] PREDICTED: Anastrepha sororcula 60S ribosomal protein L27a, Partial CDS
RpL27A	KY205083	S_0_07	[organism=Anastrepha sororcula] PREDICTED: Anastrepha sororcula 60S ribosomal protein L27a, Partial CDS
RpL27A	KY205084	S_0_08	[organism=Anastrepha sororcula] PREDICTED: Anastrepha sororcula 60S ribosomal protein L27a, Partial CDS
RpL27A	KY205085	S_0_09	[organism=Anastrepha sororcula] PREDICTED: Anastrepha sororcula 60S ribosomal protein L27a, Partial CDS
RpL27A	KY205086	S_0_10	[organism=Anastrepha sororcula] PREDICTED: Anastrepha sororcula 60S ribosomal protein L27a, Partial CDS
porin	KY205087	F_0_01	[organism=Anastrepha fraterculus] PREDICTED: Anastrepha fraterculus voltage-dependent anion-selective channel, Partial CDS
porin	KY205088	F_0_02	[organism=Anastrepha fraterculus] PREDICTED: Anastrepha fraterculus voltage-dependent anion-selective channel, Partial CDS
porin	KY205089	F_0_03	[organism=Anastrepha fraterculus] PREDICTED: Anastrepha fraterculus voltage-dependent anion-selective channel, Partial CDS
porin	KY205090	F_0_04	[organism=Anastrepha fraterculus] PREDICTED: Anastrepha fraterculus voltage-dependent anion-selective channel, Partial CDS
porin	KY205091	F_0_05	[organism=Anastrepha fraterculus] PREDICTED: Anastrepha fraterculus voltage-dependent anion-selective channel, Partial CDS
porin	KY205092	F_0_06	[organism=Anastrepha fraterculus] PREDICTED: Anastrepha fraterculus voltage-dependent anion-selective channel, Partial CDS
porin	KY205093	F_0_07	[organism=Anastrepha fraterculus] PREDICTED: Anastrepha fraterculus voltage-dependent anion-selective channel, Partial CDS
porin	KY205094	F_0_08	[organism=Anastrepha fraterculus] PREDICTED: Anastrepha fraterculus voltage-dependent anion-selective channel, Partial CDS
porin	KY205095	F_0_09	[organism=Anastrepha fraterculus] PREDICTED: Anastrepha fraterculus voltage-dependent anion-selective channel, Partial CDS
porin	KY205096	O_0_01	[organism=Anastrepha obliqua] PREDICTED: Anastrepha obliqua voltage-dependent anion-selective channel, Partial CDS
porin	KY205097	O_0_02	[organism=Anastrepha obliqua] PREDICTED: Anastrepha obliqua voltage-dependent anion-selective channel, Partial CDS
porin	KY205098	O_0_03	[organism=Anastrepha obliqua] PREDICTED: Anastrepha obliqua voltage-dependent anion-selective channel, Partial CDS
porin	KY205099	O_0_04	[organism=Anastrepha obliqua] PREDICTED: Anastrepha obliqua voltage-dependent anion-selective channel, Partial CDS
porin	KY205100	O_0_05	[organism=Anastrepha obliqua] PREDICTED: Anastrepha obliqua voltage-dependent anion-selective channel, Partial CDS
porin	KY205101	O_0_06	[organism=Anastrepha obliqua] PREDICTED: Anastrepha obliqua voltage-dependent anion-selective channel, Partial CDS
porin	KY205102	O_0_07	[organism=Anastrepha obliqua] PREDICTED: Anastrepha obliqua voltage-dependent anion-selective channel, Partial CDS
porin	KY205103	O_0_08	[organism=Anastrepha obliqua] PREDICTED: Anastrepha obliqua voltage-dependent anion-selective channel, Partial CDS
porin	KY205104	O_0_09	[organism=Anastrepha obliqua] PREDICTED: Anastrepha obliqua voltage-dependent anion-selective channel, Partial CDS
porin	KY205105	O_0_10	[organism=Anastrepha obliqua] PREDICTED: Anastrepha obliqua voltage-dependent anion-selective channel, Partial CDS
porin	KY205106	S_0_01	[organism=Anastrepha sororcula] PREDICTED: Anastrepha sororcula voltage-dependent anion-selective channel, Partial CDS
porin	KY205107	S_0_02	[organism=Anastrepha sororcula] PREDICTED: Anastrepha sororcula voltage-dependent anion-selective channel, Partial CDS
porin	KY205108	S_0_04	[organism=Anastrepha sororcula] PREDICTED: Anastrepha sororcula voltage-dependent anion-selective channel, Partial CDS
porin	KY205109	S_0_05	[organism=Anastrepha sororcula] PREDICTED: Anastrepha sororcula voltage-dependent anion-selective channel, Partial CDS
porin	KY205110	S_0_06	[organism=Anastrepha sororcula] PREDICTED: Anastrepha sororcula voltage-dependent anion-selective channel, Partial CDS
porin	KY205111	S_0_07	[organism=Anastrepha sororcula] PREDICTED: Anastrepha sororcula voltage-dependent anion-selective channel, Partial CDS
porin	KY205112	S_0_08	[organism=Anastrepha sororcula] PREDICTED: Anastrepha sororcula voltage-dependent anion-selective channel, Partial CDS
porin	KY205113	S_0_09	[organism=Anastrepha sororcula] PREDICTED: Anastrepha sororcula voltage-dependent anion-selective channel, Partial CDS
porin	KY205114	S_0_10	[organism=Anastrepha sororcula] PREDICTED: Anastrepha sororcula voltage-dependent anion-selective channel, Partial CDS
Beta_Tub85D	KY205115	F_0_01	[organism=Anastrepha fraterculus] PREDICTED: Anastrepha fraterculus tubulin beta-2 chain, Partial CDS
Beta_Tub85D	KY205116	F_0_02	[organism=Anastrepha fraterculus] PREDICTED: Anastrepha fraterculus tubulin beta-2 chain, Partial CDS
Beta_Tub85D	KY205117	F_0_03	[organism=Anastrepha fraterculus] PREDICTED: Anastrepha fraterculus tubulin beta-2 chain, Partial CDS
Beta_Tub85D	KY205118	F_0_04	[organism=Anastrepha fraterculus] PREDICTED: Anastrepha fraterculus tubulin beta-2 chain, Partial CDS
Beta_Tub85D	KY205119	F_0_05	[organism=Anastrepha fraterculus] PREDICTED: Anastrepha fraterculus tubulin beta-2 chain, Partial CDS
Beta_Tub85D	KY205120	F_0_06	[organism=Anastrepha fraterculus] PREDICTED: Anastrepha fraterculus tubulin beta-2 chain, Partial CDS
Beta_Tub85D	KY205121	F_0_07	[organism=Anastrepha fraterculus] PREDICTED: Anastrepha fraterculus tubulin beta-2 chain, Partial CDS
Beta_Tub85D	KY205122	F_0_08	[organism=Anastrepha fraterculus] PREDICTED: Anastrepha fraterculus tubulin beta-2 chain, Partial CDS
Beta_Tub85D	KY205123	F_0_09	[organism=Anastrepha fraterculus] PREDICTED: Anastrepha fraterculus tubulin beta-2 chain, Partial CDS
Beta_Tub85D	KY205124	O_0_01	[organism=Anastrepha obliqua] PREDICTED: Anastrepha obliqua tubulin beta-2 chain, Partial CDS
Beta_Tub85D	KY205125	O_0_02	[organism=Anastrepha obliqua] PREDICTED: Anastrepha obliqua tubulin beta-2 chain, Partial CDS
Beta_Tub85D	KY205126	O_0_03	[organism=Anastrepha obliqua] PREDICTED: Anastrepha obliqua tubulin beta-2 chain, Partial CDS
Beta_Tub85D	KY205127	O_0_04	[organism=Anastrepha obliqua] PREDICTED: Anastrepha obliqua tubulin beta-2 chain, Partial CDS
Beta_Tub85D	KY205128	O_0_05	[organism=Anastrepha obliqua] PREDICTED: Anastrepha obliqua tubulin beta-2 chain, Partial CDS
Beta_Tub85D	KY205129	O_0_06	[organism=Anastrepha obliqua] PREDICTED: Anastrepha obliqua tubulin beta-2 chain, Partial CDS
Beta_Tub85D	KY205130	O_0_07	[organism=Anastrepha obliqua] PREDICTED: Anastrepha obliqua tubulin beta-2 chain, Partial CDS
Beta_Tub85D	KY205131	O_0_08	[organism=Anastrepha obliqua] PREDICTED: Anastrepha obliqua tubulin beta-2 chain, Partial CDS
Beta_Tub85D	KY205132	O_0_09	[organism=Anastrepha obliqua] PREDICTED: Anastrepha obliqua tubulin beta-2 chain, Partial CDS
Beta_Tub85D	KY205133	O_0_10	[organism=Anastrepha obliqua] PREDICTED: Anastrepha obliqua tubulin beta-2 chain, Partial CDS
Beta_Tub85D	KY205134	S_0_01	[organism=Anastrepha sororcula] PREDICTED: Anastrepha sororcula tubulin beta-2 chain, Partial CDS
Beta_Tub85D	KY205135	S_0_02	[organism=Anastrepha sororcula] PREDICTED: Anastrepha sororcula tubulin beta-2 chain, Partial CDS
Beta_Tub85D	KY205136	S_0_04	[organism=Anastrepha sororcula] PREDICTED: Anastrepha sororcula tubulin beta-2 chain, Partial CDS
Beta_Tub85D	KY205137	S_0_05	[organism=Anastrepha sororcula] PREDICTED: Anastrepha sororcula tubulin beta-2 chain, Partial CDS
Beta_Tub85D	KY205138	S_0_06	[organism=Anastrepha sororcula] PREDICTED: Anastrepha sororcula tubulin beta-2 chain, Partial CDS
Beta_Tub85D	KY205139	S_0_07	[organism=Anastrepha sororcula] PREDICTED: Anastrepha sororcula tubulin beta-2 chain, Partial CDS
Beta_Tub85D	KY205140	S_0_08	[organism=Anastrepha sororcula] PREDICTED: Anastrepha sororcula tubulin beta-2 chain, Partial CDS
Beta_Tub85D	KY205141	S_0_09	[organism=Anastrepha sororcula] PREDICTED: Anastrepha sororcula tubulin beta-2 chain, Partial CDS
Beta_Tub85D	KY205142	S_0_10	[organism=Anastrepha sororcula] PREDICTED: Anastrepha sororcula tubulin beta-2 chain, Partial CDS
UQCR-C2	KY205143	F_0_01	[organism=Anastrepha fraterculus] PREDICTED: Anastrepha fraterculus cytochrome b-c1 complex subunit 2, mitochondrial, Partial CDS
UQCR-C2	KY205144	F_0_02	[organism=Anastrepha fraterculus] PREDICTED: Anastrepha fraterculus cytochrome b-c1 complex subunit 2, mitochondrial, Partial CDS
UQCR-C2	KY205145	F_0_03	[organism=Anastrepha fraterculus] PREDICTED: Anastrepha fraterculus cytochrome b-c1 complex subunit 2, mitochondrial, Partial CDS
UQCR-C2	KY205146	F_0_04	[organism=Anastrepha fraterculus] PREDICTED: Anastrepha fraterculus cytochrome b-c1 complex subunit 2, mitochondrial, Partial CDS
UQCR-C2	KY205147	F_0_05	[organism=Anastrepha fraterculus] PREDICTED: Anastrepha fraterculus cytochrome b-c1 complex subunit 2, mitochondrial, Partial CDS
UQCR-C2	KY205148	F_0_06	[organism=Anastrepha fraterculus] PREDICTED: Anastrepha fraterculus cytochrome b-c1 complex subunit 2, mitochondrial, Partial CDS
UQCR-C2	KY205149	F_0_07	[organism=Anastrepha fraterculus] PREDICTED: Anastrepha fraterculus cytochrome b-c1 complex subunit 2, mitochondrial, Partial CDS
UQCR-C2	KY205150	F_0_08	[organism=Anastrepha fraterculus] PREDICTED: Anastrepha fraterculus cytochrome b-c1 complex subunit 2, mitochondrial, Partial CDS
UQCR-C2	KY205151	F_0_09	[organism=Anastrepha fraterculus] PREDICTED: Anastrepha fraterculus cytochrome b-c1 complex subunit 2, mitochondrial, Partial CDS
UQCR-C2	KY205152	O_0_01	[organism=Anastrepha obliqua] PREDICTED: Anastrepha obliqua cytochrome b-c1 complex subunit 2, mitochondrial, Partial CDS
UQCR-C2	KY205153	O_0_02	[organism=Anastrepha obliqua] PREDICTED: Anastrepha obliqua cytochrome b-c1 complex subunit 2, mitochondrial, Partial CDS
UQCR-C2	KY205154	O_0_03	[organism=Anastrepha obliqua] PREDICTED: Anastrepha obliqua cytochrome b-c1 complex subunit 2, mitochondrial, Partial CDS
UQCR-C2	KY205155	O_0_04	[organism=Anastrepha obliqua] PREDICTED: Anastrepha obliqua cytochrome b-c1 complex subunit 2, mitochondrial, Partial CDS
UQCR-C2	KY205156	O_0_05	[organism=Anastrepha obliqua] PREDICTED: Anastrepha obliqua cytochrome b-c1 complex subunit 2, mitochondrial, Partial CDS
UQCR-C2	KY205157	O_0_06	[organism=Anastrepha obliqua] PREDICTED: Anastrepha obliqua cytochrome b-c1 complex subunit 2, mitochondrial, Partial CDS
UQCR-C2	KY205158	O_0_07	[organism=Anastrepha obliqua] PREDICTED: Anastrepha obliqua cytochrome b-c1 complex subunit 2, mitochondrial, Partial CDS
UQCR-C2	KY205159	O_0_08	[organism=Anastrepha obliqua] PREDICTED: Anastrepha obliqua cytochrome b-c1 complex subunit 2, mitochondrial, Partial CDS
UQCR-C2	KY205160	O_0_09	[organism=Anastrepha obliqua] PREDICTED: Anastrepha obliqua cytochrome b-c1 complex subunit 2, mitochondrial, Partial CDS
UQCR-C2	KY205161	O_0_10	[organism=Anastrepha obliqua] PREDICTED: Anastrepha obliqua cytochrome b-c1 complex subunit 2, mitochondrial, Partial CDS
UQCR-C2	KY205162	S_0_01	[organism=Anastrepha sororcula] PREDICTED: Anastrepha sororcula cytochrome b-c1 complex subunit 2, mitochondrial, Partial CDS
UQCR-C2	KY205163	S_0_02	[organism=Anastrepha sororcula] PREDICTED: Anastrepha sororcula cytochrome b-c1 complex subunit 2, mitochondrial, Partial CDS
UQCR-C2	KY205164	S_0_04	[organism=Anastrepha sororcula] PREDICTED: Anastrepha sororcula cytochrome b-c1 complex subunit 2, mitochondrial, Partial CDS
UQCR-C2	KY205165	S_0_05	[organism=Anastrepha sororcula] PREDICTED: Anastrepha sororcula cytochrome b-c1 complex subunit 2, mitochondrial, Partial CDS
UQCR-C2	KY205166	S_0_06	[organism=Anastrepha sororcula] PREDICTED: Anastrepha sororcula cytochrome b-c1 complex subunit 2, mitochondrial, Partial CDS
UQCR-C2	KY205167	S_0_07	[organism=Anastrepha sororcula] PREDICTED: Anastrepha sororcula cytochrome b-c1 complex subunit 2, mitochondrial, Partial CDS
UQCR-C2	KY205168	S_0_08	[organism=Anastrepha sororcula] PREDICTED: Anastrepha sororcula cytochrome b-c1 complex subunit 2, mitochondrial, Partial CDS
UQCR-C2	KY205169	S_0_09	[organism=Anastrepha sororcula] PREDICTED: Anastrepha sororcula cytochrome b-c1 complex subunit 2, mitochondrial, Partial CDS
UQCR-C2	KY205170	S_0_10	[organism=Anastrepha sororcula] PREDICTED: Anastrepha sororcula cytochrome b-c1 complex subunit 2, mitochondrial, Partial CDS
[truncated: 206 more columns]
